# 1 Aryl hydrocarbon receptor (AhR) activation by 2 2,3,7,8-tetrachlorodibenzo-*p*-dioxin (TCDD) dose-dependently 3 shifts the gut microbiome consistent with the progression of 4 steatosis to steatohepatitis with fibrosis

5 Russell R. Fling<sup>1,3</sup>, Tim R. Zacharewski<sup>2,3\*</sup>

6 <sup>1</sup> Microbiology and Molecular Genetics, Michigan State University, East Lansing, MI 48824; flingrus@msu.edu  
7 <sup>2</sup> Biochemistry and Molecular Biology, Michigan State University, East Lansing, MI;  
8 <sup>3</sup> Institute for Integrative Toxicology, Michigan State University, East Lansing, MI 48824  
9 \* Correspondence: tzacher@msu.edu; Tel.: +1 (517) 355-1607

10 **Abstract:** Gut dysbiosis with disrupted enterohepatic bile acid metabolism is commonly associated  
11 with non-alcoholic fatty liver disease (NAFLD) and recapitulated in a NAFLD-phenotype elicited  
12 by 2,3,7,8-tetrachlorodibenzo-*p*-dioxin (TCDD) in mice. TCDD induces hepatic fat accumulation  
13 and increases levels of secondary bile acids including tauroolithocholic acid and deoxycholic acid,  
14 microbial modified bile acids involved in host bile acid regulation signaling pathways. To investi-  
15 gate the effects of TCDD on the gut microbiota, cecum contents of male C57BL/6 mice orally  
16 gavaged with sesame oil vehicle or 0.3, 3, or 30 µg/kg TCDD were examined using shotgun  
17 metagenomic sequencing. Taxonomic analysis identified dose-dependent increases in *Lactobacillus*  
18 species (i.e., *Lactobacillus reuteri*). Increased species were also associated with dose-dependent in-  
19 creases in bile salt hydrolase sequences, responsible for deconjugation reactions in secondary bile  
20 acid metabolism. Increased *L. reuteri* levels were further associated with mevalonate-dependent  
21 isopentenyl diphosphate (IPP) biosynthesis and menaquinone biosynthesis genes. Analysis of gut  
22 microbiomes from cirrhosis patients identified increased abundance of these pathways as identi-  
23 fied in the mouse cecum metagenomic analysis. These results extend the association of lactobacilli  
24 with the AhR/intestinal axis in NAFLD progression and highlight the similarities between  
25 TCDD-elicited phenotypes in mice to human NAFLD.

26 **Keywords:** 2,3,7,8-tetrachlorodibenzo-*p*-dioxin; dioxin; aryl hydrocarbon receptor; non-alcoholic  
27 fatty liver disease; gut microbiome; fibrosis; gut dysbiosis; secondary bile acids  
28

## 29 1. Introduction

30 Non-alcoholic fatty liver disease (NAFLD) is estimated to affect ~25% of the global  
31 population and is defined as a spectrum of progressive pathologies that include steatosis,  
32 immune cell infiltration/inflammation, fibrosis, and cirrhosis. It is associated with in-  
33 creased risk for hepatocellular carcinoma, and is the 2<sup>nd</sup> leading cause of liver transplants  
34 in the United States[1]. Other pathologies including obesity, type 2 diabetes (T2D), and  
35 coronary heart disease demonstrate high co-occurrence with NAFLD, e.g., ~40-70% in  
36 T2D patients and ~90% in obese patients[2]. A multi-hit hypothesis for NAFLD proposes  
37 several contributing factors to development and progression including disruptions in the  
38 immune system, adipose tissue metabolism, and the gut microbiome[3]. Emerging evi-  
39 dence also suggests environmental contaminants may play an underappreciated role in  
40 gut dysbiosis and NAFLD development[4–11]. Specifically,  
41 2,3,7,8-tetrachlorodibenzo-*p*-dioxin (TCDD), a persistent environmental organochloride  
42 pollutant, induces steatosis and the progression to steatohepatitis with fibrosis in mice  
43 resembling human NAFLD development[9,12–14]. TCDD-induced dyslipidemia also

44 exhibits other similar NAFLD characteristics such as decreased VLDL secretion, free fatty  
45 acid accumulation, inhibition of  $\beta$ -oxidation, and disrupted cholesterol and bile acid  
46 metabolism[9,15–18].

47 The effects of TCDD and other related polychlorinated dibenzo-*p*-dioxins (PCDDs),  
48 dibenzofurans (PCDFs) and biphenyl (PCBs) as well as polyaromatic hydrocarbons  
49 (PAHs), are mediated through activation of the aryl hydrocarbon receptor (AhR), a basic  
50 helix-loop-helix/Per-Arnt-Sim transcription factor typically associated with xenobiotic  
51 metabolism[19]. In addition, the AhR plays an essential role in gut homeostasis through  
52 regulation of the immune system and bile acid metabolism[9,15,20,21], with endogenous  
53 and xenobiotic AhR ligands affecting the gut microbiome congruent with NAFLD-like  
54 pathology[8–10]. Moreover, gut dysbiosis is commonly reported in NAFLD, making the  
55 gut microbiome an attractive target for non-invasive diagnostic tools and potential target  
56 for intervention[22,23].

57 Although the AhR exhibits promiscuous binding activity for a wide variety of  
58 structurally diverse xenobiotics, natural products, and endogenous metabolites, its en-  
59 dogenous role remains unknown[24]. Upon ligand binding, the cytosolic AhR disassoci-  
60 ates from chaperone proteins and translocates to the nucleus where it dimerizes with the  
61 AhR nuclear transporter (ARNT). The AhR/ARNT heterodimer complex then binds to  
62 dioxin response elements located throughout the genome, affecting gene expression[25].  
63 Endobiotic ligands for the AhR include host-derived metabolites such as tryptophan  
64 catabolites (*e.g.*, L-kynurenine), microbial-produced indole derivatives (*e.g.*,  
65 indole-3-aldehyde produced by *Lactobacillus reuteri*), and compounds derived from fruits  
66 and cruciferous vegetables (*e.g.*, 6-formylindolo[3,2-b]carbazole [FICZ])[24]. Microbial  
67 produced indoles activate AhR in the intestine, affecting barrier function and homeosta-  
68 sis by regulating the intestinal immune system through CD4<sup>+</sup> T-cell differentiation, and  
69 the induction of interleukin (IL)-22 and IL-10 cytokine production[25]. AhR-dependent  
70 IL-22 induction subsequently increases antimicrobial peptides expression in intestinal  
71 epithelial cells, inhibiting pathogen infection and inflammation[25–27].

72 Knockout models and/or treatment with endogenous and xenobiotic AhR ligands  
73 results in shifts in the gut microbiome with diverse effects depending on the model and  
74 ligand[8,11,27–29]. Shifts in Firmicutes/Bacteroidetes ratio can differ between AhR lig-  
75 ands, *e.g.*, 2,3,7,8-tetrachloro dibenzofuran decreased the ratio [8] whereas TCDD in-  
76 creased it[11]. However, responses in various AhR models are in agreement regarding  
77 increased secondary bile acids [8,9] and effects on segmented filamentous bacteria  
78 [8,11,28]. AhR knockout models, and treatment with TCDD or other endogenous com-  
79 pounds also demonstrate strong correlations between AhR activation and enrichment of  
80 *Lactobacillus* species, *i.e.*, *L. reuteri* [27–31]. Tryptophan catabolism to AhR ligands by  
81 *Lactobacillus* species is a proposed mechanism for gut microbial regulation of AhR sig-  
82 naling that modulates intestinal and gut microbiome homeostasis[27].

83 Bile acids also affect the gut microbiome by exerting antimicrobial activity[32].  
84 Conversely, the gut microbiota play critical roles in host bile acid homeostasis through  
85 microbial metabolism that qualitatively and quantitatively impact bile acid composition  
86 with consequences for bile acid activated signaling pathways in the host. The gut  
87 microbiome performs the first step of bile acid deconjugation with subsequent oxidation,  
88 reduction or dehydroxylation reactions to produce diverse secondary bile acid molecular  
89 species[33]. Select secondary bile acids, *e.g.*, glycodeoxycholic acid [GDCA], demonstrate  
90 higher inhibition of bacterial growth compared to other primary and secondary bile ac-  
91 ids[34]. In regards to the host, some secondary bile acids, *e.g.*, lithocholic acid [LCA] and  
92 deoxycholic acid [DCA]), exhibit high affinity for the farnesoid x receptor (FXR) and G  
93 protein-coupled bile acid receptor (TGR5, *a.k.a.*, GPBAR1), which regulate glucose, lipid,  
94 and bile acid homeostasis[35–37]. In human NAFLD, secondary bile acid metabolism is  
95 disrupted with bile acid analogs that target FXR and TGR5 signaling pathways under  
96 development for the treatment of liver disease [23,32,38].

97  
98  
99  
100  
101  
102

Previous work has demonstrated serum levels of LCA and DCA increased following TCDD treatment suggesting enrichment for microbial bile acid metabolism[9]. To further explore dose-dependent disruptions in gut microbiome and microbial metabolism relevant to the progression of NAFLD-like pathologies, shotgun metagenomic analysis was used to examine the dose dependent taxonomic and metabolic disruptions elicited by TCDD.

103  
104  
105  
106  
107  
108

## 2. Results

### 2.1. TCDD-elicited toxicity enriched for *Lactobacillus* species

Taxonomic analysis identified significant dose-dependent population shifts among caecum microbiota in response to TCDD. While no significance was observed between treatment groups at the phylum level, a decreasing trend was observed for Bacteroidetes concurrent with increasing trends in Firmicutes abundance (Figure 1a).

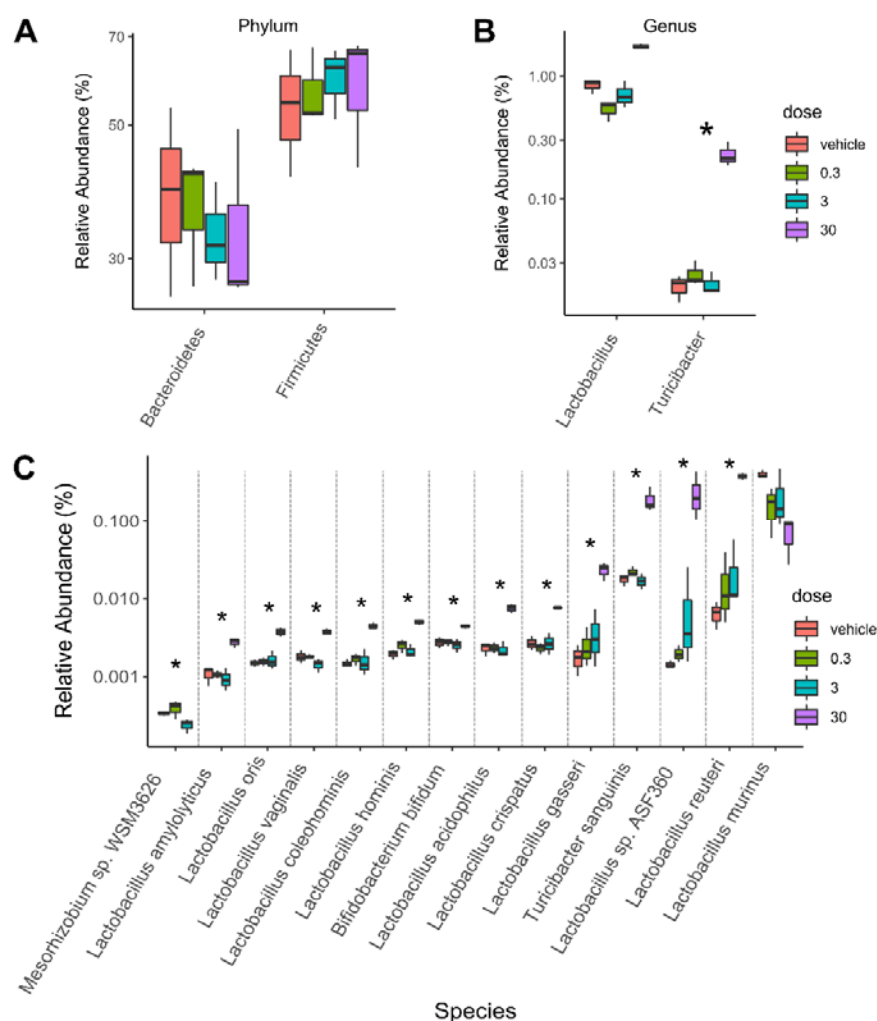

109  
110  
111  
112  
113  
114  
115

**Figure 1.** TCDD enriched *Lactobacillus* species in the cecum microbiota. Taxa abundance were assessed in metagenomic cecum samples from male C57BL/6 mice following oral gavage with sesame oil vehicle or 0.3, 3 or 30 µg/kg TCDD every 4 days for 28 days (n=3). Significant shifts in relative abundances of taxa are presented at the (A) phylum, (B) genus, (C) and species levels. Significance is denoted with an asterisk (\*; adjusted p-value < 0.1).

116 At the genus level, *Turicibacter* was enriched by TCDD while the genus *Lactobacillus*  
 117 trended towards enrichment (Figure 1b). Interestingly, at the species level, 10 out of 13  
 118 enriched species were from the *Lactobacillus* genus (e.g., *L. reuteri* and *Lactobacillus sp.*  
 119 *ASF360*) as well as *Turicibacter sanguinis*. Conversely, the most abundant *Lactobacillus*  
 120 species in vehicle treated mice, *Lactobacillus murinus*, trended towards a dose-dependent  
 121 decrease (Figure 1c).

## 2.2 Bile salt hydrolase (*bsh*) levels correlated with significantly enriched species

123 Many *Lactobacillus* species deconjugate primary conjugated bile acids mediated by  
 124 bile salt hydrolases (BSH), imparting bile acid tolerance[39]. To further investigate the  
 125 effect of TCDD on bile acid metabolism, *bsh* sequences were annotated and quantified  
 126 within metagenomic samples. Annotations to *bsh* were increased by TCDD and associ-  
 127 ated with enriched species including *L. reuteri* and *T. sanguinis* (Figure 1c, Figure 2a, and  
 128 Table S1).

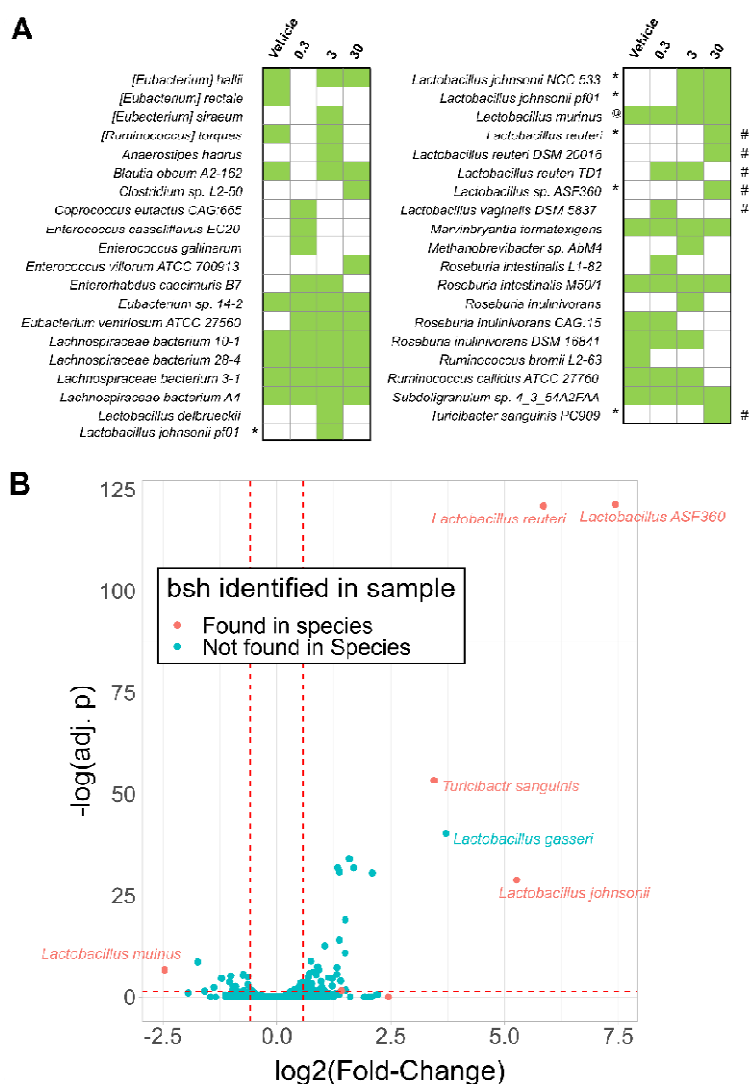

129  
 130 **Figure 2.** TCDD enriched *Lactobacillus* species possessing bile salt hydrolase (*bsh*). The presence of  
 131 *bsh* gene sequences were assessed in metagenomic caecum samples from male C57BL/6 mice fol-  
 132 lowing oral gavage with sesame oil vehicle or 0.3, 3, or 30 µg/kg TCDD every 4 days for 28 days  
 133 using 3 independent cohorts (n=3). (A) The presence (green boxes) or absence of *bsh* sequences de-  
 134 tected in any of the metagenomic samples (n=3) are denoted within the respective treatment

135 groups. Significant increases (\*) or decreases (@) in normalized *bsh* abundances (adj.  $p < 0.1$ ) are  
 136 denoted. Also denoted is significantly increased species (#) determined by taxonomic analysis that  
 137 corresponded with respective RefSeq species *bsh* annotations. Significance was determined by  
 138 Maaslin2 R package. **(B)** Volcano plot displaying  $\log_2(\text{fold-changes})$  in relative abundance of spe-  
 139 cies between vehicle and 30  $\mu\text{g}/\text{kg}$  TCDD treatment groups versus  $-\log(\text{adjusted } p\text{-values [adj. } p])$ .  
 140 Red dots denotes *bsh* sequences detected in 30  $\mu\text{g}/\text{kg}$  TCDD treatment group. Significance was de-  
 141 termined by the DeSeq2 R package comparing only vehicle and 30  $\mu\text{g}/\text{kg}$  TCDD groups. Red  
 142 dashed lines are reference to  $-\log(0.05)$  value for y-axis and -1 and 1 for x-axis.

143 Conversely, *L. murinus* associated *bsh* annotations exhibited a dose-dependent decrease  
 144 consistent with decreasing trends in taxonomic abundance. Although not reaching sig-  
 145 nificance, many *bsh* sequences were also associated with unclassified Lachnospiraceae  
 146 species including *Lachnospiraceae bacterium A4*, a community member reaching 5-23%  
 147 relative abundance in the cecum metagenomic samples (Figure 2a). In contrast, *Lactoba-*  
 148 *cillus gasseri* was enriched but no *bsh* sequences were identified (Figure 2b). To summa-  
 149 rize, the top enriched species were also associated with increased abundances in *bsh* lev-  
 150 els in the cecum.

### 2.3 TCDD enriched for mevalonate-dependent isoprenoid biosynthesis

153 To investigate other metabolic pathways imparting competitive advantages to  
 154 TCDD-elicited gut environmental stresses, functional gene annotations associated with *L.*  
 155 *reuteri*, the highest enriched species, were assessed. Among enriched uniref90 annota-  
 156 tions in the cecum metagenomic dataset was the aromatic amino acid aminotransferase  
 157 (UniRef90\_A0A2S1ENB9) also classified to *L. reuteri* (Table S2). Aromatic amino acid  
 158 aminotransferase produces a tryptophan metabolite, indole-3-aldehyde, a known AhR  
 159 ligand reported to induce IL-22 *in vivo*[27]. Among 39 enzyme commission (EC) annota-  
 160 tions that were enriched and associated with *L. reuteri* were several annotated to the  
 161 isoprenoid biosynthesis pathway (Figure 3, Figure S1, and Table S3).

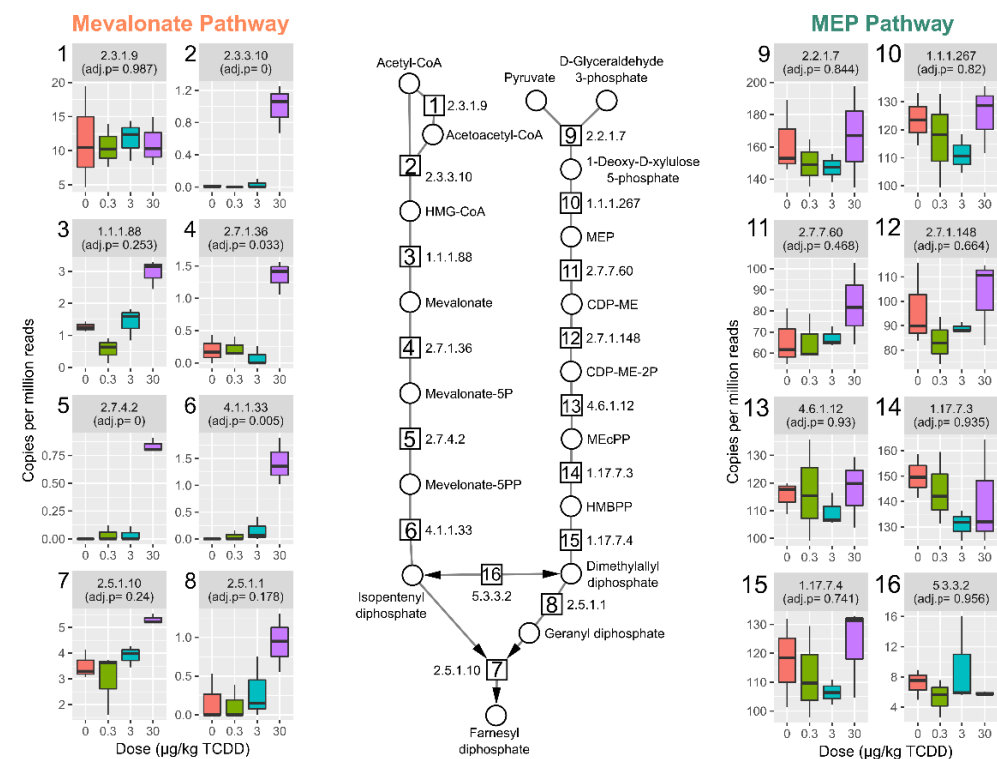

163 **Figure 3.** TCDD enriched genes from the mevalonate-dependent isoprenoid biosynthesis pathway.  
 164 **(a)** Relative abundance of genes involved in isoprenoid biosynthesis and grouped by enzyme

165 commission (EC) numbers for the mevalonate dependent and 2-C-methyl-D-erythritol 4-phosphate  
 166 (MEP) pathways in cecum samples from male C57BL6 mice following oral gavage with sesame oil  
 167 vehicle or 0.3, 3, or 30 µg/kg TCDD every 4 days for 28 days (n=3). Individual box plots are also  
 168 numbered with the EC number matching the enzymatic step in pathway schematic. Adjusted  
 169 p-values (adj. p) were determined by the Maaslin2 R package. Abbreviations:  
 170 3-hydroxyl-3-methyl-clutaryl-CoA (HMG-CoA), (R)-5-Phosphomevalonate (mevalonate-5P),  
 171 (R)-5-Diphosphomevalonate (mevalonate-5PP), 2-C-Methyl-D-erythritol 4-phosphate (MEP),  
 172 4-(Cytidine 5'-diphospho)-2-C-methyl-D-erythritol (CDP-ME), 4-(Cytidine  
 173 5'-diphospho)-2-C-methyl-D-erythritol (DEP-ME-2P), 2-C-Methyl-D-erythritol  
 174 2,4-cyclodiphosphate (MEcPP), 1-Hydroxy-2-methyl-2-butenyl 4-diphosphate (HMBPP).

175 Bacteria biosynthesize the isoprenoid, isopentenyl diphosphate (IPP), either through the  
 176 mevalonate-dependent pathway, which is also found in mammals, or the  
 177 methylerythritol phosphate (MEP)-pathway. Both *L. reuteri* and *Lactobacillus johnsonii*  
 178 were the major contributors to mevalonate-dependent IPP biosynthesis pathway en-  
 179 richment with almost all genes in the pathway increased by TCDD (Figure 3 and Figure  
 180 S1). Gene enrichment in the alternative MEP-pathway were unchanged by TCDD. For *L.*  
 181 *murinus*, only two EC annotations (EC 2.7.1.148,  
 182 4-Diphosphocytidyl-2-C-methyl-D-erythritol (CDP-ME) kinase, and EC 5.3.3.2,  
 183 isopentenyl-diphosphate Delta-isomerase) were identified in the MEP pathway also  
 184 found in *L. reuteri* (Figure S2).

185 HUMAnN 3.0 analysis of a published metagenomics dataset of fecal samples from  
 186 human cirrhotic patients (<https://www.ebi.ac.uk/ena/data/view/PRJEB6337>) [40] revealed  
 187 strikingly similar results to our caecum samples from TCDD treated mice. Specifically,  
 188 increased gene abundance associated with the mevalonate-dependent pathways was also  
 189 evident in patients with compensated and decompensated liver disease (Figure 4).

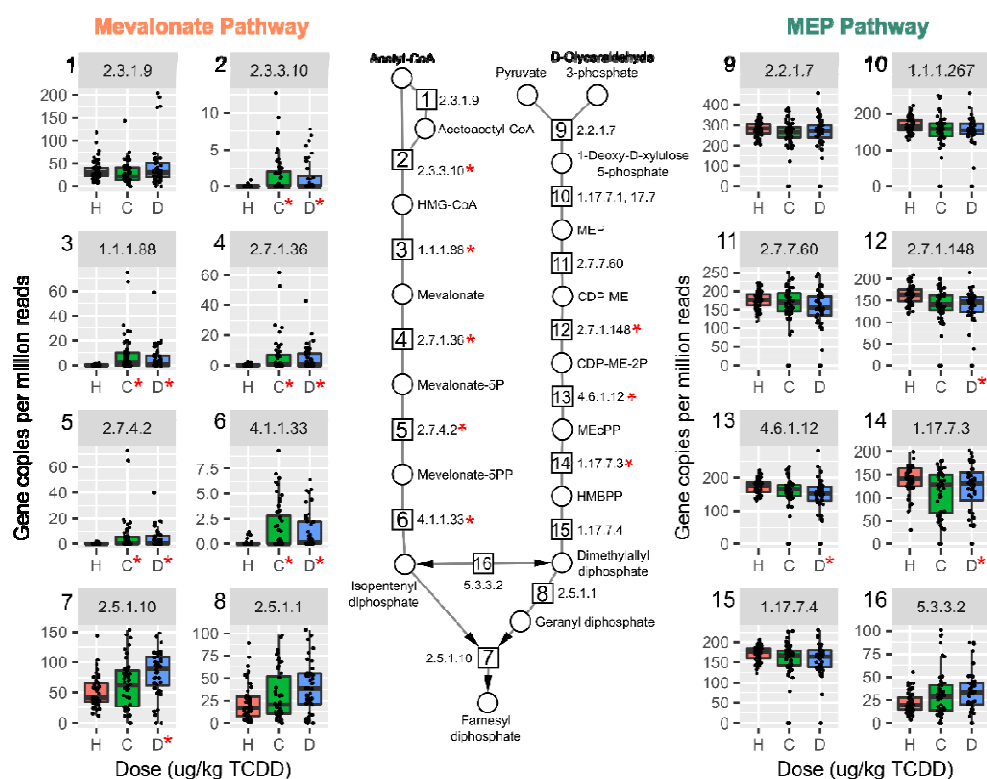

190  
 191 **Figure 4.** Mevalonate-dependent isoprenoid biosynthesis genes are enriched in a published  
 192 metagenomics dataset of fecal samples from cirrhosis patients. Humann3 analysis of fecal gut  
 193 microbiomes in healthy (H, red, n=52), compensated (C, green, n=48), or decompensated (D, blue,  
 194 n=44) cirrhosis for mevalonate-dependent and methyl-D-erythritol 4-phosphate (MEP) pathways.

195 Individual boxplots are numbered with the EC number matching the enzymatic step in pathway  
 196 schematic. Significance is denoted with a red asterisk (\*, adjusted p-values < 0.05) compared to  
 197 healthy group. Abbreviations.: 3-hydroxyl-3-methyl-clutaryl-CoA (HMG-CoA),  
 198 (R)-5-Phosphomevalonate (mevalonate-5P), (R)-5-Diphosphomevalonate (mevalonate-5PP),  
 199 2-C-Methyl-D-erythritol 4-phosphate (MEP), 4-(Cytidine 5'-diphospho)-2-C-methyl-D-erythritol  
 200 (CDP-ME), 4-(Cytidine 5'-diphospho)-2-C-methyl-D-erythritol (DEP-ME-2P),  
 201 2-C-Methyl-D-erythritol 2,4-cyclodiphosphate (MEcPP), 1-Hydroxy-2-methyl-2-butenyl  
 202 4-diphosphate (HMBPP).

203 Compensated cirrhosis is defined as no decrease in liver function while decompensated  
 204 cirrhosis exhibit decreased liver function. Among decompensated patients with cirrhosis,  
 205 the mevalonate dependent IPP pathway was increased in 7 out of 8 EC numbers required  
 206 for *de novo* IPP biosynthesis (Figure 4). Taxa annotated to genes in the pathway exhibited  
 207 a wide variety in genera for each EC number in human samples compared to murine  
 208 cecum samples from this study (Figure S3). Taxonomy classified to a majority of the  
 209 mevalonate-dependent genes were from the Lactobacillaceae family including *Enterococcus*,  
 210 *Lactobacillus*, *Streptococcus* genera (Figure S3 and Table S5). *Lactobacillus* and  
 211 *Streptococcus* species including *L. reuteri* and *Streptococcus anginosus*, a known pathogen  
 212 in liver abscesses[41], were among species classified to the pathway (Table S4 and Table  
 213 S5).

#### 214 2.4 Vitamin K2 (menaquinone) and peptidoglycan biosynthesis pathways in mouse 215 NAFLD-phenotypes and gut microbiomes of cirrhosis patients

216 In polyprenol diphosphate biosynthesis, IPP is recursively added to geranyl  
 217 diphosphate (GPP) or farnesyl diphosphate (FPP) for polyprenol biosynthesis used in  
 218 vitamin K2 (*a.k.a.*, menaquinone) and peptidoglycan biosynthesis [42,43]. TCDD enriched  
 219 for heptaprenyl diphosphate synthase (EC 2.5.1.30) with major contributions from *L.*  
 220 *reuteri* and *L. johnsonii* (Figure 5).

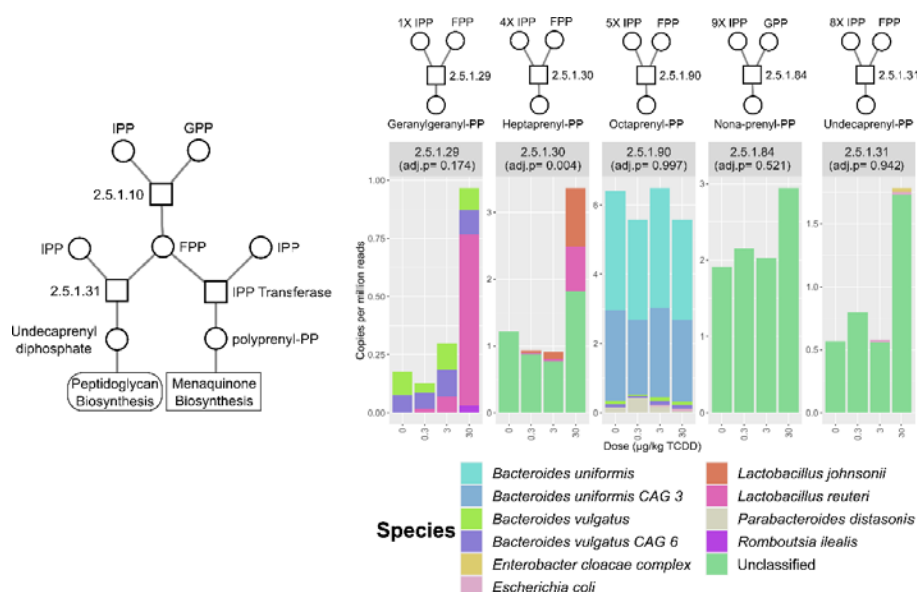

221  
 222 **Figure 5.** Relative abundance of polyprenyl transferase EC annotations identified in the mouse  
 223 cecum metagenomic dataset. Stacked bar plots represent mean relative abundance of grouped EC  
 224 numbers (n=3) and represent identified species that contributed to mean total abundance for each  
 225 treatment group. The number of isopentenyl diphosphate (IPP) and farnesyl diphosphate (FPP)  
 226 molecules used for respective polyprenol biosynthesis are also denoted. Adjusted p-values were  
 227 determined by the Maaslin2 R package. Abbreviations: isopentenyl diphosphate (IPP), geranyl  
 228 diphosphate (GPP), polypprenyl diphosphate (polypprenyl-PP).

229  
230  
231  
232  
233

Because bacterial cell wall restructuring has been reported in response to bile acids and different levels of isoprenoid biosynthesis pathways were identified, peptidoglycan biosynthesis was also assessed[44]. Most genes encoding enzymes required for peptidoglycan biosynthesis were present in the metagenomic dataset (Figure 6a) with no changes observed following TCDD treatment.

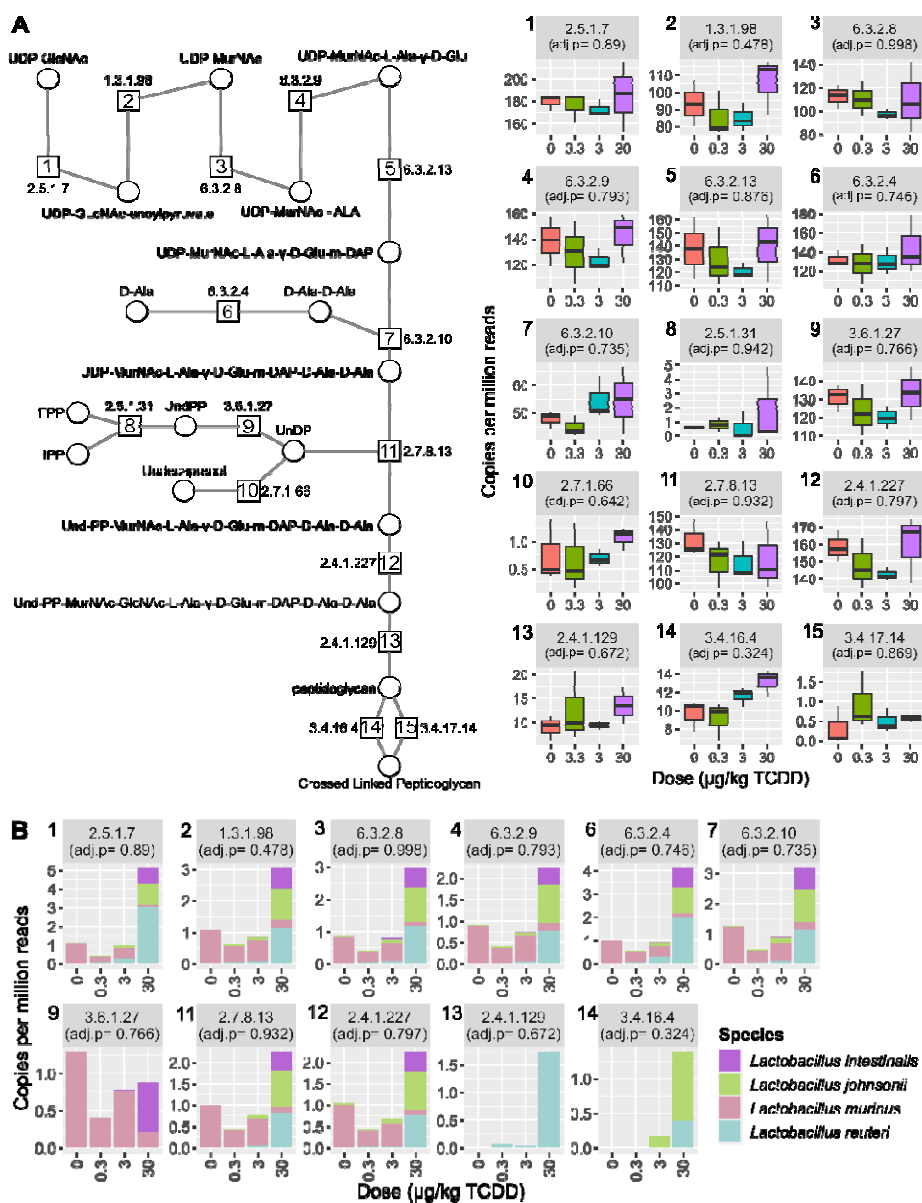

234  
235  
236  
237  
238  
239  
240  
241  
242  
243  
244  
245  
246

**Figure 6.** Peptidoglycan biosynthesis was unchanged by TCDD. (A) Relative abundance of peptidoglycan biosynthesis EC numbers identified in the metagenomic dataset. (B) Relative abundance of only *Lactobacillus* species classified to peptidoglycan biosynthesis EC numbers. Individual boxplots are numbered with the EC number matching the enzymatic step in pathway schematic. Adjusted p-values (adj.p) were determined by MAASLIN2. Abbreviations: UDP-N-acetyl-alpha-D-glucosamine (UDP-GlcNAc), UDP-N-acetylmuramate (UDP-MurNAc), UDP-N-acetyl-alpha-D-muramoyl-L-alanine (UDP-MurNAc-ALA), UDP-N-acetyl-alpha-D-muramoyl-L-alanyl-D-glutamate(UDP-MurNAc-Ala-D-Glu), UDP-N-acetylmuramoyl-L-alanyl-gamma-D-glutamyl-meso-2,6-diaminopimelate (UDP-MurNAc-Ala-D-Glu-m-DAP), D-Alanyl-D-alanine (D-Ala-D-Ala), UDP-N-acetylmuramoyl-L-alanyl-D-glutamyl-6-carboxy-L-lysyl-D-alanyl-D-alanine (UDP-MurNAc-L-Ala-D-Glu-m-DAP-D-Ala-D-Ala).



247 Undecaprenyl-diphospho-N-acetylmuramoyl-L-alanyl-D-glutamyl-meso-2,6-diaminopimeloyl-D-  
248 alanyl-D-alanine  
249 (Und-PP-MurNAc-Ala-D-Glu-m-DAP-D-Ala-D-Ala), Undecaprenyl-diphospho-N-acetylmuramoyl  
250 -(N-acetylglucosamine)-L-alanyl-D-glutamyl-meso-2,6-diaminopimeloyl-D-alanyl-D-alanine  
251 (Und-PP-MurNAc-GlcNAc-Ala-D-Glu-m-DAP-D-Ala-D-Ala)

252 However, serine-type D-Ala-D-Ala carboxypeptidase (Figure 6a, EC 3.4.16.4, step 14),  
253 responsible for peptidoglycan polymer crosslinking, trended upwards. Additionally,  
254 most peptidoglycan biosynthesis EC numbers had annotations to *L. reuteri* (Figure 6b).  
255 Overall, TCDD did not alter peptidoglycan synthesis related gene levels.

256 *De novo* menaquinone biosynthesis requires chorismate and the addition of a  
257 polyprenol diphosphate (*i.e.*, geranyl-geranyl diphosphate) (Figure 7a). Two alternative

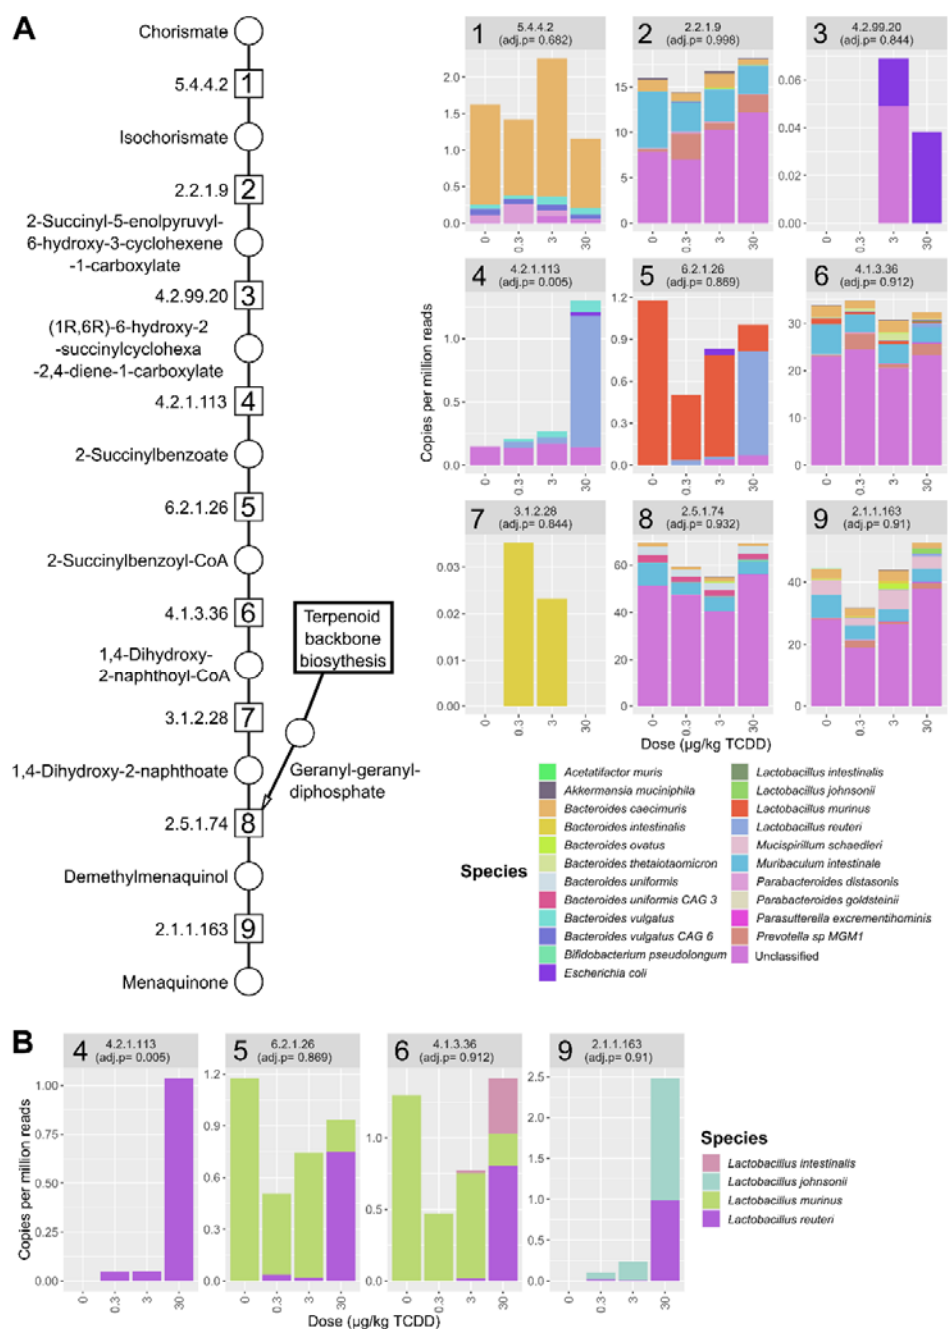

258

259

260

261

262

263

264

265

266

**Figure 7.** TCDD-elicited effects on menaquinone biosynthesis. **(A)** Relative abundance of menaquinone biosynthesis EC annotations identified in the metagenomic dataset. Individual stacked bar plots are labeled with the EC number matching the enzymatic step in pathway schematic. Stacked bar plots of annotated EC numbers involved in menaquinone biosynthesis. Values are mean relative abundance ( $n=3$ ) classified to respective species and in cecum samples from male C57BL/6 mice following oral gavage with sesame oil vehicle or 0.3, 3, or 30  $\mu\text{g/kg}$  TCDD every 4 days for 28 days. **(B)** Menaquinone biosynthesis EC numbers classified to *Lactobacillus* species in the cecum metagenomic datasets. Adjusted p-values (adj. p) were determined by Maaslin2 R package.

267

268

269

270

pathways exist for menaquinone biosynthesis, the o-succinylbenzoate or futasolone route[45]. Only a few EC number annotations were detected for the futasolone pathway (EC 4.2.1.151 and EC 2.5.1.120), while all EC numbers were identified for the complete o-succinylbenzoate-menaquinone pathway (Figure 7a). In the mouse cecum dataset, one

271 cies contributing to o-succinylbenzoate menaquinone biosynthesis pathway included  
 272 *Escherichia coli*, several *Bacteroides* (e.g., *Bacteroides vulgatus* and *Bacteroides caecimuris*),  
 273 and *Lactobacillus* species (e.g., *L. reuteri*) (Figure 7b and Table S6). No one species was  
 274 annotated to the entire set of enzymes needed for *de novo* biosynthesis from chorismate,  
 275 however *B. vulgatus* was annotated for 6 out of 9 genes in the pathway (Table S6).  
 276 O-Succinylbenzoate synthase (Figure 6a, EC 4.2.1.113, step 4) was increased by 30 µg/kg  
 277 TCDD with *L. reuteri* being the major contributor to relative abundance (Figure 7, step 4).  
 278 *Lactobacillus* species annotated to menaquinone biosynthesis included *L. reuteri*, *L.*  
 279 *murinus*, and *L. johnsonii*. Among annotated menaquinone biosynthesis EC numbers, *L.*  
 280 *reuteri* was among the identified *Lactobacillus* species that had the highest relative  
 281 abundance and most menaquinone EC annotations (Figure 7b). *L. reuteri* also had anno-  
 282 tations in samples for EC numbers involved in the final steps of the shikimate pathway  
 283 responsible for chorismate biosynthesis (Table S7).

284 In cirrhosis samples, several EC numbers representing the initial menaquinone bi-  
 285 osynthesis steps were also increased in compensated and decompensated patients (Fig-  
 286 ure 8, steps 1,3,4-5) including o-succinylbenzoate synthase (Figure 8, EC 4.2.1.113, step 4).

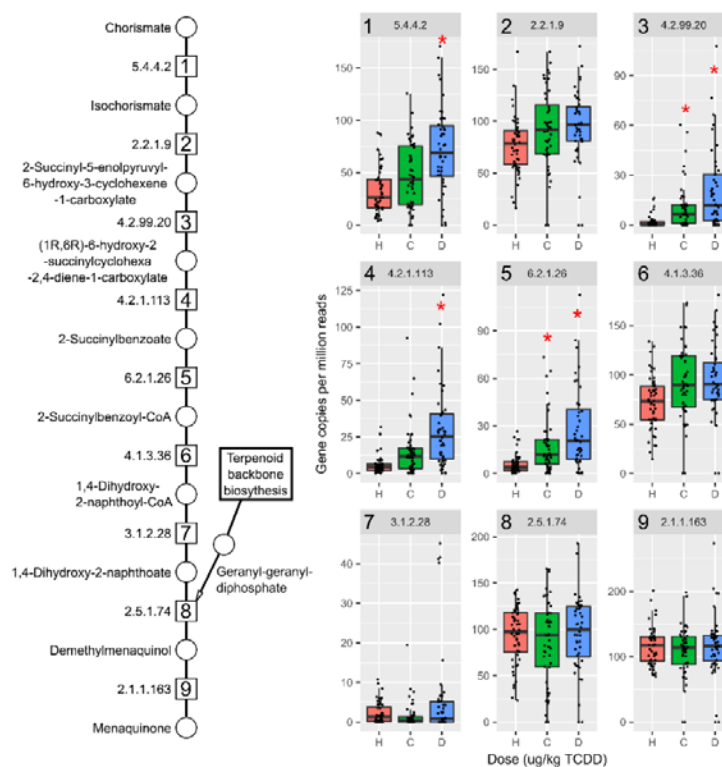

287  
 288 **Figure 8.** Menaquinone biosynthesis genes are increased in cirrhotic patients. Humann3 analysis of  
 289 fecal metagenomic dataset of patients with healthy (H, red, n=52), compensated (C, green, n=48), or  
 290 decompensated (D, blue, n=44) liver cirrhosis diagnosis for EC numbers in menaquinone biosyn-  
 291 thesis. Individual box plots are labeled with the EC number matching the enzymatic step in path-  
 292 way schematic. Significance is denoted with a red asterisk (\*; adjusted p-values < 0.05) with the  
 293 healthy group as reference.

294 However, *L. reuteri* was not among species classified to this EC number. Species classified  
 295 to all EC numbers comprising the complete pathway included *E. coli*, and *Klebsiella* speci-  
 296 es such as *K. pneumoniae* and *Citrobacter* species. *L. reuteri* was not annotated to any  
 297 menaquinone biosynthesis genes in healthy or compensated patients, but several EC  
 298 numbers in the decompensated group (EC 6.2.1.26, 4.1.3.6, and 2.1.1.163) which are in-  
 299 volved in later stages of menaquinone biosynthesis (Table S8).

300

### 3. Discussion

301

Previous studies have reported that TCDD elicited NAFLD-like pathologies, dysregulated bile acid metabolism and gut microbiome dysbiosis [9,11,15,29,31]. This study further elucidated the shifts in the gut microbiota associated with TCDD treatment using shotgun metagenomic sequencing. We show TCDD dose-dependently shifted the gut microbiota composition by enriching for Lactobacillus species, consistent with hepatic disruption of host and microbial bile acid metabolism. In addition, TCDD enriched for genes involved in mevalonate dependent isoprenoid precursor biosynthesis and menaquinone biosynthesis, crucial for microbial cell growth and survival. Over-representation of these microbial associated pathways were also identified in human cirrhosis stool metagenomics datasets.

311

TCDD-elicited gut dysbiosis is in agreement with observed effects in published *in vivo* studies following treatment with endogenous (*i.e.*, FICZ) and exogenous (*i.e.*, TCDD and TCDF) AhR agonists[8,9,11,29–31]. More specifically, we observed an increased Firmicutes/Bacteroides ratio with dose-dependent increases in Lactobacillus species[29,31]. Lactobacillus species are often associated with NAFLD, with increased abundances in patients with diabetes and liver fibrosis[46]. Probiotic Lactobacillus species including *L. reuteri* supplementation is also reported to alleviate NAFLD pathologies by reducing steatosis[47], fibrosis[48], insulin resistance[49] and serum cholesterol levels[50]. However, Lactobacillus species supplementation may also exacerbate fibrosis[51]. In humans and mice, *L. reuteri* supplementation can modulate the gut microbiota and alter bile acid metabolism. *L. reuteri* enrichment also approached comparable levels compared to samples from humans and mice administered probiotic supplementation[52,53]. We observed a species-specific increase of *L. reuteri* with a concurrent decrease in *L. murinus* suggesting shifts in Lactobacillus composition at the species and/or strain levels. Further, decreased abundance of *L. murinus* has been reported in human NAFLD[54]. Other taxa enriched following treatment included *Turicibacter sanguinis*, an anaerobic gram-positive bacillus commonly found in animals, including humans[55]. Interestingly, *T. sanguinis* has been shown to deconjugate bile acids and metabolize serotonin affecting lipid and steroid metabolism[55,56]. Quantitative trait locus analysis correlated *T. sanguinis* abundance with cholic acid levels and expression of the intestinal bile acid transporter *Slc10a2*[55]. Both cholic acid levels and *Slc10a2* expression are dose-dependently increased by TCDD[9]. Consequently, the dose-dependent taxonomic shift in Lactobacillus and Turicibacter species known to deconjugate conjugated bile acids is consistent with increased levels of secondary bile acids following TCDD treatment.

335

Some host relevant intestinal health and homeostatic effects can be attributed to Lactobacillus species mediated by bile salt hydrolases (BSHs) which are responsible for deconjugation reactions, the gateway step for conversion of conjugated primary bile acid to secondary bile acids [57]. A majority of Lactobacillus species possess BSHs, often containing multiple different gene copies within their genome, some with different bile acid substrate preferences[34,39]. However, the presence of *bsh* sequences does not simply infer bile acid tolerance as growth inhibition and reduced fitness is also possible depending on the conjugated or deconjugated bile acids present and/or BSH specificity.[34,39,58] For example, *L. gasseri* *bsh* knockout mutants exhibit increased fitness compared to wild type strains[39]. Interestingly, *L. gasseri* *bsh* sequences were not identified despite increased *L. gasseri* abundance following TCDD treatment. Our *bsh* analysis also found TCDD enriched Lactobacillus-associated sequences that may impart bile acid tolerance. For example, the *bsh* sequence enriched by TCDD annotated to *L. johnsonii* (RefSeq ID: EGP12391) (Table S3) exhibited higher substrate specificity for glycine over taurine conjugated bile acids[59,60]. In a companion study using the dose response and treatment regimen, Fader *et al* reported TCDD increased serum DCA levels ~80-fold, with only a ~ 2-fold increase in serum GDCA levels[9]. In contrast, hepatic tauroolithocholic acid (TLCA) levels were increased ~233-fold while serum lithocholic acid increased only 4-fold following TCDD treatment. Moreover, glycine conjugated bile acids including

353

354 GDCA are more toxic towards *Lactobacillus* species than taurine conjugated bile acids[34,61,62]. Increased levels of BSH with a substrate preference for glycine conjugated  
355 bile acid may partially explain select *Lactobacillus* species enrichment. Further, both  
356 TLCA and DCA are potent FXR and GPBAR1 agonists that regulate lipid, glucose and  
357 bile acid metabolism[63,64]. Consequently, shifts in microbial secondary bile acids by  
358 *Lactobacillus* species may play a role in TCDD elicited gut dysbiosis impacting host reg-  
359 ulation of energy homeostasis.  
360

361 Coincident with increased levels of *bsh* was the dose-dependent increase in genes  
362 from the mevalonate-dependent isoprenoid biosynthesis, the pathway also used in  
363 mammals for cholesterol biosynthesis. The MEP pathway is the predominant isoprenoid  
364 biosynthesis pathway among gut microbiota while the mevalonate-dependent pathway  
365 is only found in select bacteria including *Lactobacillus* and *Streptococcus* species[65]. The  
366 output from either pathway is farnesyl diphosphate (FPP) and geranyl diphosphate  
367 (GPP), substrates required for polyprenol biosynthesis used in menaquinone and cell  
368 wall biosynthesis. Menaquinones are utilized by bacteria for anaerobic/aerobic respira-  
369 tion, providing antioxidant activity with menaquinone supplementation affecting the gut  
370 microbiome[66]. In the context of *L. reuteri*, we observed genes annotated to the shikimate  
371 pathway which is responsible for chorismate biosynthesis, a precursor for aromatic  
372 amino acids and the naphthoquinone head group of menaquinone, as well as genes in-  
373 volved in *de novo* menaquinone biosynthesis. While the complete biosynthesis pathway  
374 was not present in *L. reuteri*, it is consistent with other metagenomic reports of incom-  
375 plete menaquinone biosynthesis pathways in gut *Lactobacillus* species [45]. It has been  
376 proposed that *Lactobacillus* species may participate in later menaquinone biosynthesis  
377 steps through the uptake of intermediates such as o-succinylbenzoate from other bacteria  
378 or dietary sources[45]. In addition, the ability to utilize menaquinones for respiration is  
379 typically not associated with *Lactobacillus* species. However, some lactic acid bacteria  
380 including *L. reuteri* strains demonstrate the ability to respire when menaquinone and  
381 heme are supplemented[67,68].

382 Metagenomic analysis also identified the mevalonate-dependent pathway enrich-  
383 ment in fecal samples from patients with cirrhosis. The mevalonate-dependent pathway  
384 is reported to be increased in fibrosis patients with autoimmune pathologies[69].  
385 Isoprenoid biosynthesis pathways are also elevated in the lung microbiome of cystic fi-  
386 brosis patients, with the MEP pathway enriched rather than the mevalonate route[70].  
387 The association between fibrosis and isoprenoid biosynthesis enrichment warrants fur-  
388 ther investigation in the context of potential mechanisms contributing to bacterial fitness  
389 and/or fibrosis. Increased abundance of the mevalonate-dependent biosynthesis pathway  
390 could also be a biomarker of *Lactobacillus* and *Streptococcus* proliferation that is often  
391 associated with non-alcoholic steatohepatitis (NASH)/fibrosis[22,46]. We identified en-  
392 richment of the mevalonate-dependent pathway in both mouse and human microbiomes  
393 whereas the complete pathway was primarily annotated to *Streptococcus* and *Lactoba-*  
394 *cillus* species (Table S7). Other factors such simvastatin and proton pump inhibitors (PPI)  
395 that are commonly prescribed for NAFLD patients may also impact these microbial  
396 pathways. Simvastatin, which is primarily excreted in the feces[71], is reported to reduce  
397 bacterial growth by directly inhibiting bacterial HMG-CoA synthesis while PPIs inhibit  
398 *Streptococcus* species growth[72–74]. These microbiome-drug interactions highlight off  
399 target effects that should be considered when investigating novel NAFLD treatments  
400 such as new drug development and/or probiotic interventions.

401 In addition to increased mevalonate-dependent isoprenoid biosynthesis genes in  
402 cirrhotic patients, menaquinone biosynthesis gene abundance was also increased. This  
403 suggests taxa with the ability to produce menaquinone may have a competitive ad-  
404 vantage when intestinal environmental conditions shift during disease progression. In  
405 cirrhosis patients, *E. coli* and *B. vulgatus* were associated with genes providing a majority  
406 of the menaquinone biosynthesis capacity. These species are also increased in human  
407 NAFLD[75]. Similar to the results in mice exposed to TCDD, *L. reuteri* was associated

408 with several menaquinone biosynthesis genes and only detected in decompensated cir-  
409 rrhosis patients but lacked the complete pathway (Table S10). In cirrhosis patients, it is  
410 unclear whether *L. reuteri* is participating in menaquinone metabolism and/or benefiting  
411 from increased abundance of species, like *E. coli* that are capable of producing  
412 menaquinones.

413 This study was designed to account for factors affecting gut microbiota analysis in-  
414 cluding coprophagia and circadian rhythm (refs). Significant shifts in taxa were observed  
415 in *Lactobacillus* species. However, the small group size (n=3) following adjustment for  
416 multiple testing lacked sufficient power to confirm more subtle shifts such as the 2-fold  
417 enrichment of *Lachnospiraceae A4*, an abundant community member associated with *bsh*  
418 sequences. Samples were also collected within the same Zeitgeber period to account for  
419 possible variations in relative microbiota levels due to circadian rhythm/diurnal regula-  
420 tion. In fact, *L. reuteri* is one gut microbiome member demonstrating changes in relative  
421 abundance in human samples due to circadian/diurnal regulation[76]. TCDD disrupted  
422 diurnal regulation of hepatic gene expression including bile acid biosynthesis genes  
423 which may contribute to *L. reuteri* enrichment[77].

424 Although the consequences of TCDD-elicited immune system effects on the gut  
425 microbiome were not assessed in this study, it is most likely a factor impacting *L. reuteri*  
426 enrichment. TCDD causes macrophage and dendritic cell migration out of the *lamina*  
427 *propria* with increased accumulation in the liver, possibly exacerbating hepatic inflam-  
428 mation and affecting intestinal immune responses[14]. The ability of *L. reuteri* to produce  
429 AhR ligands, upregulate IL-22, and associate with the mucosa and Peyer's patches pro-  
430 vides geographical proximity for immune/microbiome crosstalk mediated by the AhR  
431 [27,78,79]. Besides immune cell regulation, TCDD increased bone formation and de-  
432 creased bone marrow adiposity[80]. Interestingly, *L. reuteri* supplementation also in-  
433 creased bone density, but only when mice are induced towards an inflammatory  
434 state[81]. Overall, the dose-dependent increase in *L. reuteri* levels are consistent with in-  
435 creased bile acid levels, disruption of circadian/diurnal regulation and increased bone  
436 density[9,77,80,81].

437 In summary, *Lactobacillus* species were dose-dependently increased following AhR  
438 activation by TCDD, concurrent with the increase in *bsh* genes and increased primary and  
439 secondary bile acids. Specifically, *L. reuteri*, a keystone gut microbiome species is in-  
440 volved in microbial metabolism of bile acids and AhR ligands. The large and uniform  
441 enrichment of *L. reuteri* in this study also suggests environmental pressures such as in-  
442 creased levels of bile acids and antimicrobial peptides elicited by AhR activation may  
443 provide a complementary niche for *L. reuteri* that possess a gene repertoire not found in  
444 the closely related *L. murinus*. We also provide evidence on how *L. reuteri* metabolism  
445 could impact AhR, FXR and GPBAR1 signaling pathways, placing *L. reuteri* at the cross-  
446 roads of bacterial/host interactions affecting glucose, bile acid, and immune regulation.  
447 Whether these microbial shifts in metabolism are adaptive and limit the intensity of ad-  
448 verse consequences or exacerbates steatosis to steatohepatitis with fibrosis progression  
449 warrants further investigation.

## 450 4. Materials and Methods

### 451 4.1 Animal treatment

452 Postnatal day 25 (PND25) male C57BL/6 mice weighing within 10% of each other  
453 were obtained from Charles River Laboratories (Kingston, NY) and housed and treated  
454 as previously described[9]. Briefly, mice were housed in Innovive Innocages (San Diego,  
455 CA) containing ALPHA-dri bedding (Shepherd Specialty Papers, Chicago, IL) in a 23°C  
456 environment with 30–40% humidity and a 12 hr/12 hr light/dark cycle. Aquavive water  
457 (Innovive) and Harlan Teklad 22/5 Rodent Diet 8940 (Madison, WI) were provided *ad*  
458 *libitum*. The rodent diet is a fixed formula complete diet with an energy density of 3.0  
459 kcal/g and a nutrient ingredient composition including 22% protein, 5.5% fat, and 40.6%

460 carbohydrate. Mice (PND29) were orally gavaged at the beginning of the light cycle  
461 (between Zeitgeber time 0-3) with 0.1 ml sesame oil vehicle (Sigma-Aldrich, St. Louis,  
462 MO) or 0.3, 3 and 30  $\mu\text{g}/\text{kg}$  body weight TCDD (AccuStandard, New Haven, CT) every 4  
463 days for 7 total exposures ( $n=3$  per treatment group). The study was conducted in three  
464 cohorts with mice housed separately among treatment groups for a total of 9 mice per  
465 treatment group. In each cohort, three mice were housed per treatment group and one  
466 mouse was randomly selected from each treatment group per cohort ( $n=3$  per treatment  
467 group for the metagenomic analysis) to account for coprophagia and ensure reproducibility.  
468 The first gavage was administered on day 0 of the study. On day 28, vehicle- and  
469 TCDD-treated mice (fasted for 6 hr with access to water) were weighed and euthanized  
470 between Zeitgeber time 0-3. Upon collection, cecums were immediately flash frozen in  
471 liquid nitrogen and stored at  $-80^\circ\text{C}$  until analysis. All animal handling procedures were  
472 performed with the approval of the Michigan State University (MSU) Institutional Animal  
473 Care and Use Committee.

#### 474 475 *4.2 Metagenomic sequencing*

476 Microbial DNA from cecum contents (~25 mg) was extracted using the FastDNA  
477 spin kit for soil (SKU 116560200, MP Biomedicals, Santa Ana, CA). Extracted DNA was  
478 submitted to Novogene (Sacramento, CA) for quality control, library preparation, and  
479 150-bp paired-end sequencing at a depth 136-157 million reads using an Illumina  
480 NovaSeq 6000. Reads aligning to the C57BL/6 *Mus musculus* genome (NCBI genome as-  
481 sembly: GRCm38.p6) were identified, flagged, and removed using bowtie2[82],  
482 SamTools[83] and bedtools[84]. For human metagenomic analysis, reads were filtered  
483 against the human genome (NCBI genome assembly: GRCh37/hg19) using the  
484 Kneaddata bioinformatics tool developed at the Huttenhower Lab  
485 (<https://github.com/biobakery/kneaddata>).

#### 486 487 *4.3 Metagenomic taxonomic analysis*

488 Kaiju was used for taxonomic analysis of mouse cecum metagenomic dataset. The  
489 reference database used was the progenomes database downloaded from the kaiju web-  
490 server ([https://kaiju.binf.ku.dk/database/kaiju\\_db\\_progenomes\\_2020-05-25.tgz](https://kaiju.binf.ku.dk/database/kaiju_db_progenomes_2020-05-25.tgz)). Multi-  
491 variate association between dose and taxonomy relative abundances used Maaslin2  
492 (<https://github.com/biobakery/Maaslin2>)[85] with the following default settings used:  
493 normalization (total sum scaling), analysis method (general linear model), and  
494 Benjamini-Hochberg multiple test correction. Adjusted  $p$ -values for Maaslin2 analysis  
495 used dose (sesame oil vehicle (0), 0.3, 3, or 30  $\mu\text{g}/\text{kg}$  TCDD) as the fixed effect which was  
496 treated as continuous variable and the vehicle set for reference. For comparison of tax-  
497 onomy between vehicle and 30  $\mu\text{g}/\text{kg}$  TCDD treatment groups, DeSeq2 was used to de-  
498 termine adjusted  $p$ -values using default settings[86].

#### 499 500 *4.4 Metagenomic functional analysis*

501 The HUMAnN 3.0 bioinformatic pipeline[87] was used with default settings to  
502 classify reads to UniRef90 protein identifications using UniProt's UniRef90 protein data  
503 base (January, 2019). Reads aligned to UniRef90 identifications were mapped to enzyme  
504 commission (EC) number entries using the humann\_regroup\_table tool. Read abundance  
505 was normalized to gene copies per million reads (CPM) using the human\_renorm\_table  
506 tool. Multivariate association between dose and enzyme commission number relative  
507 abundance used Maaslin2 with same settings used for taxonomy analysis.

508 Xander (a gene-targeted assembler,  
509 [https://github.com/rdpstaff/Xander\\_assembler](https://github.com/rdpstaff/Xander_assembler)) was used to annotate and quantify bile  
510 salt hydrolase sequences with the following settings: k-mer size=45, filter size=35, mini-  
511 mum assembled contig bit score=50, and minimum assembled protein contigs=100 [88].  
512 Reference DNA and protein *bsh* sequences used for Xander were downloaded from

513 FunGenes Gene Repository and are listed in supplementary material (Table S9 and Table  
514 S10)[89]. For RefSeq *bsh* sequences analysis, relative abundance was determined by  
515 normalizing to total abundance of *rplB* sequences also determined by Xander per sample.  
516 Significance was determined with Maaslin2 with same settings used for taxonomy anal-  
517 ysis

518 Human metagenomic data from the European Bioinformatics Institute European  
519 Nucleotide Archive under accession number PRJEB6337  
520 (<https://www.ebi.ac.uk/ena/data/view/PRJEB6337>) was analyzed using the same  
521 HUMAnN 3.0 pipeline as cecum metagenomic data. Fecal shotgun metagenomic samples  
522 from Chinese patients were defined as healthy (n=52) or cirrhotic with subclassifications  
523 of compensated (n=48) or decompensated (n=44) by the authors[40]. Cirrhosis was di-  
524 agnosed by either biopsy, clinical evidence of decompensation or other metrics including  
525 radiological evidence of liver nodularity and intra-abdominal varices in a patient with  
526 chronic liver disease[40]. The subclassification was used as fixed effect for analysis with  
527 healthy as the reference category. Again, Maaslin2 was used with settings used for func-  
528 tional analysis with diagnosis as a fixed effect with healthy diagnosis as reference to de-  
529 termine adjusted *p*-values for compensated and decompensated patient designations.

530 **Supplementary Materials:** The following are available online at [www.mdpi.com/xxx/s1](http://www.mdpi.com/xxx/s1), Figure S1:  
531 Stacked bar plots of annotated EC number mean relative abundance and classified species involved  
532 in isoprenoid biosynthesis in cecum of TCDD-exposed mice, Figure S2: Stacked bar plots of mean  
533 relative abundance of annotated EC numbers and classified to *Lactobacillus* species involved in  
534 isoprenoid biosynthesis in cecums of TCDD-exposed mice, Figure S3: Stacked bar plots of anno-  
535 tated EC number mean relative abundance classified to respective species and involved in  
536 mevalonate dependent isoprenoid biosynthesis in cirrhotic patients, Table S1: Relative abundance  
537 of significantly changed *bsh* sequences in mouse cecums, Table S2: Significant Uniref90 annotations  
538 in murine cecum metagenomic dataset, Table S3: Enzyme commission numbers (EC) that were  
539 significant and annotated to at least *L. reuteri* in cecums of TCDD-exposed mice, Table S4: Enzyme  
540 commission numbers (EC) with species annotated to mevalonate-dependent IPP pathway for cir-  
541 rhotic patients, Table S5: Total number of unique EC numbers determined to have greater than zero  
542 relative abundance in respective pathway (mevalonate and MEP isoprenoid biosynthesis, and  
543 menaquinone biosynthesis) in human cirrhosis patients, Table S6: Total number of unique EC  
544 numbers determined to have greater than zero relative abundance in respective pathway  
545 (mevalonate and MEP isoprenoid biosynthesis, and menaquinone biosynthesis) in TCDD-exposed  
546 mice, Table S7: Mean relative abundance denoted in counts per million (CPM) of EC annotations  
547 that were classified to *L. reuteri* and associating with chorismate biosynthesis., Table S8: EC num-  
548 bers with relative abundance of species to menaquinone biosynthesis pathway for cirrhotic pa-  
549 tients, Table S9: Nucleotide sequences used as reference in Xander *bsh* analysis, Table S10. Protein  
550 sequences used as reference in Xander *bsh* analysis.

551 **Author Contributions:** Conceptualization, R.F. and T.Z.; methodology, R.F, T.Z.; writing—original  
552 draft preparation, R.F.; writing—review and editing, R.F, T.Z.; funding acquisition, T.Z; formal  
553 analysis, R.F.; visualization, R.F.; data curation, R.F; Methodology R.F, T.Z; validation, R.F.; project  
554 administration, T.Z; investigation, R.F., T.Z; All authors have read and agreed to the published  
555 version of the manuscript.

556 **Funding:** This work was funded by the NIEHS Superfund Research Program (NIEHS SRP  
557 P42ES004911), and NIEHS R01ES029541 to T.Z. T.Z. is partially supported by AgBioResearch at  
558 Michigan State University. R.F. is supported by the NIEHS Multidisciplinary Training in Envi-  
559 ronmental Toxicology (NIEHS EHS T32ES007255).

560 **Institutional Review Board Statement:** All animal handling procedures were performed with the  
561 approval of the Michigan State University (MSU) Institutional Animal Care and Use Committee, in  
562 accordance with ethical guidelines and regulations under IACUC ID: PROTO201800043.

563 **Informed Consent Statement:** Informed consent was obtained from all subjects involved in the  
564 human metagenomics study[40].

565 **Data Availability Statement:** Quality filtered mouse metagenomic data from this study can be  
566 found at the Sequence Read Archive (SRA) (<https://www.ncbi.nlm.nih.gov/sra>) under the accession



567 ID PRJNA719224. The human fecal metagenomic data presented in this study is openly available  
568 and can be found at the SRA under the accession number PRJEB6337[40].

569 **Conflicts of Interest:** The authors declare no conflict of interest. The funders had no role in the  
570 design of the study; in the collection, analyses, or interpretation of data; in the writing of the man-  
571 uscript, or in the decision to publish the results.

572

## 573 References

- 574 1. Younossi, Z.M.; Koenig, A.B.; Abdelatif, D.; Fazel, Y.; Henry, L.; Wymer, M. Global Epidemiology of Nonalco-  
575 holic Fatty Liver Disease-Meta-Analytic Assessment of Prevalence, Incidence, and Outcomes. *Hepatology* 2016,  
576 64, 73–84, doi:10.1002/hep.28431.
- 577 2. Anstee, Q.M.; Targher, G.; Day, C.P. Progression of NAFLD to Diabetes Mellitus, Cardiovascular Disease or  
578 Cirrhosis. *Nat Rev Gastroenterol Hepatol* 2013, 10, 330–344, doi:10.1038/nrgastro.2013.41.
- 579 3. Tilg, H.; Moschen, A.R. Evolution of Inflammation in Nonalcoholic Fatty Liver Disease: The Multiple Parallel  
580 Hits Hypothesis. *Hepatology* 2010, 52, 1836–1846, doi:10.1002/hep.24001.
- 581 4. Cave, M.; Appana, S.; Patel, M.; Falkner, K.C.; McClain, C.J.; Brock, G. Polychlorinated Biphenyls, Lead, and  
582 Mercury Are Associated with Liver Disease in American Adults: NHANES 2003–2004. *Environmental Health*  
583 *Perspectives* 2010, 118, 1735–1742, doi:10.1289/ehp.1002720.
- 584 5. Zheng, S.; Yang, Y.; Wen, C.; Liu, W.; Cao, L.; Feng, X.; Chen, J.; Wang, H.; Tang, Y.; Tian, L.; et al. Effects of En-  
585 vironmental Contaminants in Water Resources on Nonalcoholic Fatty Liver Disease. *Environment International*  
586 2021, 154, 106555, doi:10.1016/j.envint.2021.106555.
- 587 6. Kumar, J.; Lind, L.; Salihovic, S.; van Bavel, B.; Ingelsson, E.; Lind, P.M. Persistent Organic Pollutants and Liver  
588 Dysfunction Biomarkers in a Population-Based Human Sample of Men and Women. *Environmental Research*  
589 2014, 134, 251–256, doi:10.1016/j.envres.2014.07.023.
- 590 7. Rantakokko, P.; Männistö, V.; Airaksinen, R.; Koponen, J.; Viluksela, M.; Kiviranta, H.; Pihlajamäki, J. Persistent  
591 Organic Pollutants and Non-Alcoholic Fatty Liver Disease in Morbidly Obese Patients: A Cohort Study. *Envi-  
592 ronmental Health* 2015, 14, 79, doi:10.1186/s12940-015-0066-z.
- 593 8. Zhang, L.; Nichols, R.G.; Correll, J.; Murray, I.A.; Tanaka, N.; Smith, P.B.; Hubbard, T.D.; Sebastian, A.; Albert, I.;  
594 Hatzakis, E.; et al. Persistent Organic Pollutants Modify Gut Microbiota–Host Metabolic Homeostasis in Mice  
595 through Aryl Hydrocarbon Receptor Activation. *Environmental Health Perspectives* 2015, 123, 679–88,  
596 doi:10.1289/ehp.1409055.
- 597 9. Fader, K.A.; Nault, R.; Zhang, C.; Kumagai, K.; Harkema, J.R.; Zacharewski, T.R.  
598 2,3,7,8-Tetrachlorodibenzo-p-Dioxin (TCDD)-Elicited Effects on Bile Acid Homeostasis: Alterations in Biosyn-  
599 thesis, Enterohepatic Circulation, and Microbial Metabolism. *Scientific Reports* 2017, 7, 5921,  
600 doi:10.1038/s41598-017-05656-8.
- 601 10. Petriello, M.C.; Hoffman, J.B.; Vsevolozhskaya, O.; Morris, A.J.; Hennig, B. Dioxin-like PCB 126 Increases Intes-  
602 tinal Inflammation and Disrupts Gut Microbiota and Metabolic Homeostasis. *Environmental Pollution* 2018, 242,  
603 1022–1032, doi:10.1016/j.envpol.2018.07.039.
- 604 11. Stedtfeld, R.D.; Chai, B.; Crawford, R.B.; Stedtfeld, T.M.; Williams, M.R.; Xiangwen, S.; Kuwahara, T.; Cole, J.R.;  
605 Kaminski, N.E.; Tiedje, J.M.; et al. Modulatory Influence of Segmented Filamentous Bacteria on Transcriptomic  
606 Response of Gnotobiotic Mice Exposed to TCDD. *Frontiers in microbiology* 2017, 8, 1708,  
607 doi:10.3389/fmicb.2017.01708.
- 608 12. Nault, R.; Fader, K.A.; Lydic, T.A.; Zacharewski, T.R. Lipidomic Evaluation of Aryl Hydrocarbon Recep-  
609 tor-Mediated Hepatic Steatosis in Male and Female Mice Elicited by 2,3,7,8- Tetrachlorodibenzo-p-dioxin.,  
610 doi:10.1021/acs.chemrestox.6b00430.
- 611 13. Nault, R.; Fader, K.A.; Ammendolia, D.A.; Dornbos, P.; Potter, D.; Sharratt, B.; Kumagai, K.; Harkema, J.R.; Lunt,  
612 S.Y.; Matthews, J.; et al. Dose-Dependent Metabolic Reprogramming and Differential Gene Expression in  
613 TCDD-Elicited Hepatic Fibrosis. *Toxicological Sciences* 2016, 154, 253–266, doi:10.1093/toxsci/kfw163.
- 614 14. Fader, K.A.; Nault, R.; Ammendolia, D.A.; Harkema, J.R.; Williams, K.J.; Crawford, R.B.; Kaminski, N.E.; Potter,  
615 D.; Sharratt, B.; Zacharewski, T.R. 2,3,7,8-Tetrachlorodibenzo-p-Dioxin Alters Lipid Metabolism and Depletes  
616 Immune Cell Populations in the Jejunum of C57BL/6 Mice. *Toxicological Sciences* 2015, 148, 567–580,  
617 doi:10.1093/toxsci/kfv206.

- 618 15. Nault, R.; Fader, K.A.; Lydic, T.A.; Zacharewski, T.R. Lipidomic Evaluation of Aryl Hydrocarbon Receptor-Mediated Hepatic Steatosis in Male and Female Mice Elicited by 2,3,7,8-Tetrachlorodibenzo-p-dioxin.,  
619 doi:10.1021/acs.chemrestox.6b00430.  
620
- 621 16. Angrish, M.M.; Dominici, C.Y.; Zacharewski, T.R. TCDD-Elicited Effects on Liver, Serum, and Adipose Lipid  
622 Composition in C57BL/6 Mice. *Toxicological Sciences* 2013, 131, 108–115, doi:10.1093/toxsci/kfs277.
- 623 17. Katsiki, N.; Mikhailidis, D.P.; Mantzoros, C.S. Non-Alcoholic Fatty Liver Disease and Dyslipidemia: An Update.  
624 *Metabolism* 2016, 65, 1109–1123, doi:10.1016/j.metabol.2016.05.003.
- 625 18. Cholico, G.N.; Fling, R.R.; Zacharewski, N.A.; Fader, K.A.; Nault, R.; Zacharewski, T. Thioesterase Induction by  
626 2,3,7,8-Tetrachlorodibenzo-p-Dioxin Results in a Futile Cycle That Inhibits Hepatic  $\beta$ -Oxidation; *Pharmacology  
627 and Toxicology*, 2021;
- 628 19. Fernandez-Salguero, P.M.; Hillbert, D.M.; Rudikoff, S.; Ward, J.M.; Gonzalez, F.J. Aryl-Hydrocarbon Receptor-  
629 Deficient Mice Are Resistant to 2,3,7,8-Tetrachlorodibenzo-p-Dioxin-Induced Toxicity. *Toxicology and Applied  
630 Pharmacology* 1996, 140, 173–179, doi:10.1006/taap.1996.0210.
- 631 20. Bock, K.W. Aryl Hydrocarbon Receptor (AHR)-Mediated Inflammation and Resolution: Non-Genomic and Genomic  
632 Signaling. *Biochemical Pharmacology* 2020, 182, 114220, doi:10.1016/j.bcp.2020.114220.
- 633 21. Schiering, C.; Wincent, E.; Metidji, A.; Iseppon, A.; Li, Y.; Potocnik, A.J.; Omenetti, S.; Henderson, C.J.; Wolf, C.R.;  
634 Nebert, D.W.; et al. Feedback Control of AHR Signalling Regulates Intestinal Immunity. *Nature* 2017, 542,  
635 242–245, doi:10.1038/nature21080.
- 636 22. Grabherr, F.; Grander, C.; Effenberger, M.; Adolph, T.E.; Tilg, H. Gut Dysfunction and Non-Alcoholic Fatty Liver  
637 Disease. *Front. Endocrinol.* 2019, 10, 611, doi:10.3389/fendo.2019.00611.
- 638 23. Leung, C.; Rivera, L.; Furness, J.B.; Angus, P.W. The Role of the Gut Microbiota in NAFLD. *Nature Reviews  
639 Gastroenterology and Hepatology* 2016, 13, 412–425, doi:10.1038/nrgastro.2016.85.
- 640 24. Tian, J.; Feng, Y.; Fu, H.; Xie, H.Q.; Jiang, J.X.; Zhao, B. The Aryl Hydrocarbon Receptor: A Key Bridging Molecule  
641 of External and Internal Chemical Signals. *Environmental science & technology* 2015, 49, 9518–31,  
642 doi:10.1021/acs.est.5b00385.
- 643 25. Rothhammer, V.; Quintana, F.J. The Aryl Hydrocarbon Receptor: An Environmental Sensor Integrating Immune  
644 Responses in Health and Disease. *Nat Rev Immunol* 2019, 19, 184–197, doi:10.1038/s41577-019-0125-8.
- 645 26. Qiu, J.; Heller, J.J.; Guo, X.; Chen, Z.M.E.; Fish, K.; Fu, Y.X.; Zhou, L. The Aryl Hydrocarbon Receptor Regulates  
646 Gut Immunity through Modulation of Innate Lymphoid Cells. *Immunity* 2012, 36, 92–104,  
647 doi:10.1016/j.immuni.2011.11.011.
- 648 27. Zelante, T.; Iannitti, R.G.; Cunha, C.; DeLuca, A.; Giovannini, G.; Pieraccini, G.; Zecchi, R.; D’Angelo, C.;  
649 Massi-Benedetti, C.; Fallarino, F.; et al. Tryptophan Catabolites from Microbiota Engage Aryl Hydrocarbon Receptor  
650 and Balance Mucosal Reactivity via Interleukin-22. *Immunity* 2013, 39, 372–385,  
651 doi:10.1016/j.immuni.2013.08.003.
- 652 28. Murray, I.A.; Nichols, R.G.; Zhang, L.; Patterson, A.D.; Perdew, G.H. Expression of the Aryl Hydrocarbon Receptor  
653 Contributes to the Establishment of Intestinal Microbial Community Structure in Mice. *Scientific Reports*  
654 2016, 6, 33969, doi:10.1038/srep33969.
- 655 29. Lefever, D.E.; Xu, J.; Chen, Y.; Huang, G.; Tamas, N.; Guo, T.L. TCDD Modulation of Gut Microbiome Correlated  
656 with Liver and Immune Toxicity in Streptozotocin (STZ)-Induced Hyperglycemic Mice. *Toxicology and Applied  
657 Pharmacology* 2016, 304, 48–58, doi:10.1016/j.taap.2016.05.016.
- 658 30. Neamah, W.H.; Busbee, P.B.; Alghetaa, H.; Abdulla, O.A.; Nagarkatti, M.; Nagarkatti, P. AhR Activation Leads  
659 to Alterations in the Gut Microbiome with Consequent Effect on Induction of Myeloid Derived Suppressor Cells  
660 in a CXCR2-Dependent Manner. *Int. J. Mol. Sci.* 2020, 18.
- 661 31. Stedtfeld, R.D.; Brett Sallach, J.; Crawford, R.B.; Stedtfeld, T.M.; Williams, M.R.; Waseem, H.; Johnston, C.T.; Li,  
662 H.; Teppen, B.J.; Kaminski, N.E.; et al. TCDD Administered on Activated Carbon Eliminates Bioavailability and  
663 Subsequent Shifts to a Key Murine Gut Commensal. *Applied Microbiology and Biotechnology* 2017, 101,  
664 7409–7415, doi:10.1007/s00253-017-8460-9.
- 665 32. Shao, J.-W.; Ge, T.-T.; Chen, S.-Z.; Wang, G.; Yang, Q.; Huang, C.-H.; Xu, L.-C.; Chen, Z. Role of Bile Acids in  
666 Liver Diseases Mediated by the Gut Microbiome. *WJG* 2021, 27, 3010–3021, doi:10.3748/wjg.v27.i22.3010.
- 667 33. Marion, S.; Desharnais, L.; Studer, N.; Dong, Y.; Notter, M.D.; Poudel, S.; Menin, L.; Janowczyk, A.; Hettich, R.L.;  
668 Hapfelmeier, S.; et al. Biogeography of Microbial Bile Acid Transformations along the Murine Gut. *Journal of  
669 Lipid Research* 2020, 61, 1450–1463, doi:10.1194/jlr.RA120001021.

- 670 34. Foley, M.H.; O'Flaherty, S.; Allen, G.; Rivera, A.J.; Stewart, A.K.; Barrangou, R.; Theriot, C.M. Lactobacillus Bile  
671 Salt Hydrolase Substrate Specificity Governs Bacterial Fitness and Host Colonization. *Proc Natl Acad Sci USA*  
672 2021, 118, e2017709118, doi:10.1073/pnas.2017709118.
- 673 35. Matsubara, T.; Li, F.; Gonzalez, F.J. FXR Signaling in the Enterohepatic System. *Molecular and Cellular Endo-*  
674 *crinology* 2013, 368, 17–29, doi:10.1016/j.mce.2012.05.004.
- 675 36. Shapiro, H.; Kolodziejczyk, A.A.; Halstuch, D.; Elinav, E. Bile Acids in Glucose Metabolism in Health and Dis-  
676 ease. *Journal of Experimental Medicine* 2018, 215, 383–396, doi:10.1084/jem.20171965.
- 677 37. Pols, T.W.H.; Noriega, L.G.; Nomura, M.; Auwerx, J.; Schoonjans, K. The Bile Acid Membrane Receptor TGR5: A  
678 Valuable Metabolic Target. *Dig Dis* 2011, 29, 37–44, doi:10.1159/000324126.
- 679 38. Fiorucci, S.; Mencarelli, A.; Palladino, G.; Cipriani, S. Bile-Acid-Activated Receptors: Targeting TGR5 and  
680 Farnesoid-X-Receptor in Lipid and Glucose Disorders. *Trends in Pharmacological Sciences* 2009, 30, 570–580,  
681 doi:10.1016/j.tips.2009.08.001.
- 682 39. O'Flaherty, S.; Briner Crawley, A.; Theriot, C.M.; Barrangou, R. The Lactobacillus Bile Salt Hydrolase Repertoire  
683 Reveals Niche-Specific Adaptation. *mSphere* 2018, 3, e00140-18, /msphere/3/3/mSphere140-18.atom,  
684 doi:10.1128/mSphere.00140-18.
- 685 40. Shao, L.; Ling, Z.; Chen, D.; Liu, Y.; Yang, F.; Li, L. Disorganized Gut Microbiome Contributed to Liver Cirrhosis  
686 Progression: A Meta-Omics-Based Study. *Front. Microbiol.* 2018, 9, 3166, doi:10.3389/fmicb.2018.03166.
- 687 41. Fazili, T.; Riddell, S.; Kiska, D.; Endy, T.; Giurgea, L.; Sharngoe, C.; Javaid, W. Streptococcus Anginosus Group  
688 Bacterial Infections. *The American Journal of the Medical Sciences* 2017, 354, 257–261,  
689 doi:10.1016/j.amjms.2017.05.011.
- 690 42. Workman, S.D.; Strynadka, N.C.J. A Slippery Scaffold: Synthesis and Recycling of the Bacterial Cell Wall Carrier  
691 Lipid. *Journal of Molecular Biology* 2020, 432, 4964–4982, doi:10.1016/j.jmb.2020.03.025.
- 692 43. Johnston, J.M.; Bulloch, E.M. Advances in Menaquinone Biosynthesis: Sublocalisation and Allosteric Regulation.  
693 *Current Opinion in Structural Biology* 2020, 65, 33–41, doi:10.1016/j.sbi.2020.05.005.
- 694 44. Hernández, S.B.; Cava, F.; Pucciarelli, M.G.; García-del Portillo, F.; de Pedro, M.A.; Casadesús, J. Bile-Induced  
695 Peptidoglycan Remodelling in *S Almonella Enterica*: Bile-Induced Peptidoglycan Remodelling. *Environ*  
696 *Microbiol* 2015, 17, 1081–1089, doi:10.1111/1462-2920.12491.
- 697 45. Ravcheev, D.A.; Thiele, I. Genomic Analysis of the Human Gut Microbiome Suggests Novel Enzymes Involved  
698 in Quinone Biosynthesis. *Front. Microbiol.* 2016, 7, doi:10.3389/fmicb.2016.00128.
- 699 46. Aron-Wisnewsky, J.; Vigliotti, C.; Witjes, J.; Le, P.; Holleboom, A.G.; Verheij, J.; Nieuwdorp, M.; Clément, K. Gut  
700 Microbiota and Human NAFLD: Disentangling Microbial Signatures from Metabolic Disorders. *Nature Reviews*  
701 *Gastroenterology & Hepatology* 2020, 17, 279–297, doi:10.1038/s41575-020-0269-9.
- 702 47. Qiao, Y.; Sun, J.; Xia, S.; Li, L.; Li, Y.; Wang, P.; Shi, Y.; Le, G. Effects of Different Lactobacillus Reuteri on In-  
703 flammatory and Fat Storage in High-Fat Diet-Induced Obesity Mice Model. *Journal of Functional Foods* 2015, 14,  
704 424–434, doi:10.1016/j.jff.2015.02.013.
- 705 48. Ting, W.-J.; Kuo, W.-W.; Hsieh, D.; Yeh, Y.-L.; Day, C.-H.; Chen, Y.-H.; Chen, R.-J.; Padma, V.; Chen, Y.-H.;  
706 Huang, C.-Y. Heat Killed Lactobacillus Reuteri GMNL-263 Reduces Fibrosis Effects on the Liver and Heart in  
707 High Fat Diet-Hamsters via TGF- $\beta$  Suppression. *IJMS* 2015, 16, 25881–25896, doi:10.3390/ijms161025881.
- 708 49. Andreasen, A.S.; Larsen, N.; Pedersen-Skovsgaard, T.; Berg, R.M.G.; Møller, K.; Svendsen, K.D.; Jakobsen, M.;  
709 Pedersen, B.K. Effects of Lactobacillus Acidophilus NCFM on Insulin Sensitivity and the Systemic Inflammatory  
710 Response in Human Subjects. *Br J Nutr* 2010, 104, 1831–1838, doi:10.1017/S0007114510002874.
- 711 50. Khare, A.; Gaur, S. Cholesterol-Lowering Effects of Lactobacillus Species. *Curr Microbiol* 2020, 77, 638–644,  
712 doi:10.1007/s00284-020-01903-w.
- 713 51. Roh, Y.S.; Cho, A.; Cha, Y.-S.; Oh, S.-H.; Lim, C.W.; Kim, B. Lactobacillus Aggravate Bile Duct Ligation-Induced  
714 Liver Inflammation and Fibrosis in Mice. *ToxicolRes* 2018, 34, 241–247, doi:10.5487/TR.2018.34.3.241.
- 715 52. Martoni, C.J.; Labbé, A.; Ganopolsky, J.G.; Prakash, S.; Jones, M.L. Changes in Bile Acids, FGF-19 and Sterol  
716 Absorption in Response to Bile Salt Hydrolase Active L. Reuteri NCIMB 30242. *Gut Microbes* 2015, 6, 57–65,  
717 doi:10.1080/19490976.2015.1005474.
- 718 53. Kumar, R.; Grover, S.; Batish, V.K. Hypocholesterolaemic Effect of Dietary Inclusion of Two Putative Probiotic  
719 Bile Salt Hydrolase-Producing Lactobacillus Plantarum Strains in Sprague–Dawley Rats. *Br J Nutr* 2011, 105,  
720 561–573, doi:10.1017/S0007114510003740.
- 721 54. Lee, N.Y.; Shin, M.J.; Youn, G.S.; Yoon, S.J.; Choi, Y.R.; Kim, H.S.; Gupta, H.; Han, S.H.; Kim, B.K.; Lee, D.Y.; et al.  
722 Lactobacillus Attenuates Progression of Nonalcoholic Fatty Liver Disease by Lowering Cholesterol and Steatosis.  
723 *Clin Mol Hepatol* 2021, 27, 110–124, doi:10.3350/cmh.2020.0125.

- 724 55. Kemis, J.H.; Linke, V.; Barrett, K.L.; Boehm, F.J.; Traeger, L.L.; Keller, M.P.; Rabaglia, M.E.; Schueler, K.L.; Sta-  
725 pleton, D.S.; Gatti, D.M.; et al. Genetic Determinants of Gut Microbiota Composition and Bile Acid Profiles in  
726 Mice. *PLoS Genet* 2019, 15, e1008073, doi:10.1371/journal.pgen.1008073.
- 727 56. Fung, T.C.; Vuong, H.E.; Luna, C.D.G.; Pronovost, G.N.; Aleksandrova, A.A.; Riley, N.G.; Vavilina, A.; McGinn,  
728 J.; Rendon, T.; Forrest, L.R.; et al. Intestinal Serotonin and Fluoxetine Exposure Modulate Bacterial Colonization  
729 in the Gut. *Nat Microbiol* 2019, 4, 2064–2073, doi:10.1038/s41564-019-0540-4.
- 730 57. Tannock, G.W.; Dashkevicz, M.P.; Feighner, S.D. Lactobacilli and Bile Salt Hydrolase in the Murine Intestinal  
731 Tract. *Appl Environ Microbiol* 1989, 55, 1848–1851, doi:10.1128/aem.55.7.1848-1851.1989.
- 732 58. Winston, J.A.; Rivera, A.; Cai, J.; Patterson, A.D.; Theriot, C.M. Secondary Bile Acid Ursodeoxycholic Acid Alters  
733 Weight, the Gut Microbiota, and the Bile Acid Pool in Conventional Mice. *PLoS ONE* 2021, 16, e0246161,  
734 doi:10.1371/journal.pone.0246161.
- 735 59. Chae, J.P.; Valeriano, V.D.; Kim, G.-B.; Kang, D.-K. Molecular Cloning, Characterization and Comparison of Bile  
736 Salt Hydrolases from *Lactobacillus Johnsonii* PF01. *J Appl Microbiol* 2013, 114, 121–133, doi:10.1111/jam.12027.
- 737 60. Déjean, G.; Tudela, H.; Bruno, L.; Kissi, D.; Rawadi, G.; Claus, S.P. Identifying a Novel Bile Salt Hydrolase from  
738 the Keystone Gut Bacterium *Christensenella Minuta*. *Microorganisms* 2021, 9, 1252,  
739 doi:10.3390/microorganisms9061252.
- 740 61. De Smet, I.; Van Hoorde, L.; Vande Woestyne, M.; Christiaens, H.; Verstraete, W. Significance of Bile Salt Hy-  
741 drolytic Activities of Lactobacilli. *Journal of Applied Bacteriology* 1995, 79, 292–301,  
742 doi:10.1111/j.1365-2672.1995.tb03140.x.
- 743 62. Bustos, A.Y.; Saavedra, L.; de Valdez, G.F.; Raya, R.R.; Taranto, M.P. Relationship between Bile Salt Hydrolase  
744 Activity, Changes in the Internal pH and Tolerance to Bile Acids in Lactic Acid Bacteria. *Biotechnol Lett* 2012, 34,  
745 1511–1518, doi:10.1007/s10529-012-0932-5.
- 746 63. Sato, H.; Macchiarulo, A.; Thomas, C.; Gioiello, A.; Une, M.; Hofmann, A.F.; Saladin, R.; Schoonjans, K.;  
747 Pellicciari, R.; Auwerx, J. Novel Potent and Selective Bile Acid Derivatives as TGR5 Agonists: Biological Screen-  
748 ing, Structure–Activity Relationships, and Molecular Modeling Studies. *J. Med. Chem.* 2008, 51, 1831–1841,  
749 doi:10.1021/jm7015864.
- 750 64. Wahlström, A.; Sayin, S.I.; Marschall, H.-U.; Bäckhed, F. Intestinal Crosstalk between Bile Acids and Microbiota  
751 and Its Impact on Host Metabolism. *Cell Metabolism* 2016, 24, 41–50, doi:10.1016/j.cmet.2016.05.005.
- 752 65. Vranová, E.; Coman, D.; Gruissem, W. Network Analysis of the MVA and MEP Pathways for Isoprenoid Syn-  
753 thesis. *Annu. Rev. Plant Biol.* 2013, 64, 665–700, doi:10.1146/annurev-arplant-050312-120116.
- 754 66. Stacchiotti, V.; Rezzi, S.; Eggersdorfer, M.; Galli, F. Metabolic and Functional Interplay between Gut Microbiota  
755 and Fat-Soluble Vitamins. *Critical Reviews in Food Science and Nutrition* 2020, 1–22,  
756 doi:10.1080/10408398.2020.1793728.
- 757 67. Brooijmans, R.; Smit, B.; Santos, F.; van Riel, J.; de Vos, W.M.; Hugenholtz, J. Heme and Menaquinone Induced  
758 Electron Transport in Lactic Acid Bacteria. *Microb Cell Fact* 2009, 8, 28, doi:10.1186/1475-2859-8-28.
- 759 68. Ianniello, R.G.; Zheng, J.; Zotta, T.; Ricciardi, A.; Gänzle, M.G. Biochemical Analysis of Respiratory Metabolism  
760 in the Heterofermentative *Lactobacillus Spicheri* and *Lactobacillus Reuteri*. *J Appl Microbiol* 2015, 119, 763–775,  
761 doi:10.1111/jam.12853.
- 762 69. Plichta, D.R.; Somani, J.; Pichaud, M.; Wallace, Z.S.; Fernandes, A.D.; Perugino, C.A.; Lähdesmäki, H.; Stone, J.H.;  
763 Vlamakis, H.; Chung, D.C.; et al. Congruent Microbiome Signatures in Fibrosis-Prone Autoimmune Diseases:  
764 IgG4-Related Disease and Systemic Sclerosis. *Genome Med* 2021, 13, 35, doi:10.1186/s13073-021-00853-7.
- 765 70. Quinn, R.A.; Whiteson, K.; Lim, Y.W.; Zhao, J.; Conrad, D.; LiPuma, J.J.; Rohwer, F.; Widder, S. Ecological Net-  
766 working of Cystic Fibrosis Lung Infections. *npj Biofilms Microbiomes* 2016, 2, 4, doi:10.1038/s41522-016-0002-1.
- 767 71. Chu, N.-N.; Chen, W.-L.; Xu, H.-R.; Li, X.-N. Pharmacokinetics and Safety of Ezetimibe/Simvastatin Combination  
768 Tablet: An Open-Label, Single-Dose Study in Healthy Chinese Subjects. *Clin Drug Investig* 2012, 32, 791–798,  
769 doi:10.1007/s40261-012-0013-5.
- 770 72. Ashrafizadeh, M.; Ahmadi, Z. Effects of Statins on Gut Microbiota (Microbiome). 6, 5.
- 771 73. Whitaker, E.; Alshammari, A. Bacteriostatic Effect of Simvastatin on Selected Oral Streptococci in Vitro. *Contemp*  
772 *Clin Dent* 2017, 8, 59, doi:10.4103/ccd.ccd\_848\_16.
- 773 74. Wu, S.; Jiang, P.; Zhao, X.-M.; Chen, W.-H. Treatment Regimens May Compromise Gut-Microbiome-Derived  
774 Signatures for Liver Cirrhosis. *Cell Metabolism* 2021, 33, 455–456, doi:10.1016/j.cmet.2021.02.012.
- 775 75. Loomba, R.; Seguritan, V.; Li, W.; Long, T.; Klitgord, N.; Bhatt, A.; Dulai, P.S.; Caussy, C.; Bettencourt, R.; High-  
776 lander, S.K.; et al. Gut Microbiome-Based Metagenomic Signature for Non-Invasive Detection of Advanced Fi-

- 777 brosis in Human Nonalcoholic Fatty Liver Disease. *Cell Metabolism* 2017, 25, 1054-1062.e5,  
778 doi:10.1016/j.cmet.2017.04.001.
- 779 76. Thaiss, C.A.; Zeevi, D.; Levy, M.; Zilberman-Schapira, G.; Suez, J.; Tengeler, A.C.; Abramson, L.; Katz, M.N.;  
780 Korem, T.; Zmora, N.; et al. Transkingdom Control of Microbiota Diurnal Oscillations Promotes Metabolic Ho-  
781 meostasis. *Cell* 2014, 159, 514–529, doi:10.1016/j.cell.2014.09.048.
- 782 77. Fader, K.A.; Nault, R.; Doskey, C.M.; Fling, R.R.; Zacharewski, T.R. 2,3,7,8-Tetrachlorodibenzo-p-Dioxin Abol-  
783 ishes Circadian Regulation of Hepatic Metabolic Activity in Mice. *Scientific Reports* 2019, 9, 1–18,  
784 doi:10.1038/s41598-019-42760-3.
- 785 78. Plant, L.; Conway, P. Association of *Lactobacillus* Spp. with Peyer's Patches in Mice. *Clin Diagn Lab Immunol*  
786 2001, 8, 320–324, doi:10.1128/CDLI.8.2.320-324.2001.
- 787 79. Wang, P.; Li, Y.; Xiao, H.; Shi, Y.; Le, G.; Sun, J. Isolation of *Lactobacillus Reuteri* from Peyer's Patches and Their  
788 Effects on SIgA Production and Gut Microbiota Diversity. *Mol. Nutr. Food Res.* 2016, 60, 2020–2030,  
789 doi:10.1002/mnfr.201501065.
- 790 80. Fader, K.A.; Nault, R.; Raetz, S.; McCabe, L.R.; Zacharewski, T.R. 2,3,7,8-Tetrachlorodibenzo-p-Dioxin  
791 Dose-Dependently Increases Bone Mass and Decreases Marrow Adiposity in Juvenile Mice. *Toxicology and*  
792 *Applied Pharmacology* 2018, 348, 85–98, doi:10.1016/j.taap.2018.04.013.
- 793 81. Collins, F.L.; Irwin, R.; Bierhalter, H.; Schepper, J.; Britton, R.A.; Parameswaran, N.; McCabe, L.R. *Lactobacillus*  
794 *Reuteri* 6475 Increases Bone Density in Intact Females Only under an Inflammatory Setting. *PLoS ONE* 2016, 11,  
795 1–17, doi:10.1371/journal.pone.0153180.
- 796 82. Langmead, B.; Salzberg, S.L. Fast Gapped-Read Alignment with Bowtie 2. *Nat Methods* 2012, 9, 357–359,  
797 doi:10.1038/nmeth.1923.
- 798 83. Danecek, P.; Bonfield, J.K.; Liddle, J.; Marshall, J.; Ohan, V.; Pollard, M.O.; Whitwham, A.; Keane, T.; McCarthy,  
799 S.A.; Davies, R.M.; et al. Twelve Years of SAMtools and BCFtools. *GigaScience* 2021, 10, giab008,  
800 doi:10.1093/gigascience/giab008.
- 801 84. Quinlan, A.R.; Hall, I.M. BEDTools: A Flexible Suite of Utilities for Comparing Genomic Features. *Bioinformatics*  
802 2010, 26, 841–842, doi:10.1093/bioinformatics/btq033.
- 803 85. Mallick, H.; Rahnavard, A.; McIver, L.J.; Ma, S.; Zhang, Y.; Nguyen, L.H.; Tickle, T.L.; Weingart, G.; Ren, B.;  
804 Schwager, E.H.; et al. Multivariable Association Discovery in Population-Scale Meta-Omics Studies; *Microbiol-*  
805 *ogy*, 2021;
- 806 86. Love, M.I.; Huber, W.; Anders, S. Moderated Estimation of Fold Change and Dispersion for RNA-Seq Data with  
807 DESeq2. *Genome Biology* 2014, 15, 1–21, doi:10.1186/s13059-014-0550-8.
- 808 87. Franzosa, E.A.; Morgan, X.C.; Segata, N.; Waldron, L.; Reyes, J.; Earl, A.M.; Giannoukos, G.; Boylan, M.R.; Ciulla,  
809 D.; Gevers, D.; et al. Relating the Metatranscriptome and Metagenome of the Human Gut. *Proceedings of the*  
810 *National Academy of Sciences of the United States of America* 2014, 111, E2329-38, doi:10.1073/pnas.1319284111.
- 811 88. Wang, Q.; Fish, J.A.; Gilman, M.; Sun, Y.; Brown, C.T.; Tiedje, J.M.; Cole, J.R. Xander<sup>2</sup>: Employing a Novel  
812 Method for Efficient Gene-Targeted Metagenomic Assembly. *Microbiome* 2015, 1–13,  
813 doi:10.1186/s40168-015-0093-6.
- 814 89. Fish, J.A.; Chai, B.; Wang, Q.; Sun, Y.; Brown, C.T.; Tiedje, J.M.; Cole, J.R. FunGene: The Functional Gene Pipeline  
815 and Repository. *Frontiers in Microbiology* 2013, 4, 1–14, doi:10.3389/fmicb.2013.00291.
